# Few shot learning for phenotype-driven diagnosis of patients with rare genetic diseases

Emily Alsentzer<sup>1,2,\*</sup>, Michelle M. Li<sup>1,3,\*</sup>, Shilpa N. Kobren<sup>1</sup>, Ayush Noori<sup>1</sup>, Undiagnosed Diseases Network<sup>4</sup>, Isaac S. Kohane<sup>1</sup>, and Marinka Zitnik<sup>1,5,6,7,‡</sup>

<sup>1</sup>Department of Biomedical Informatics, Harvard Medical School, Boston, USA

<sup>2</sup>Program in Health Sciences and Technology, Massachusetts Institute of Technology, Cambridge, USA

<sup>3</sup>Bioinformatics and Integrative Genomics Program, Harvard Medical School, Boston, USA

<sup>4</sup>Members of the Undiagnosed Diseases Network Consortium are listed at the end of this document

<sup>5</sup>Kempner Institute for the Study of Natural and Artificial Intelligence, Harvard University, USA

<sup>6</sup>Broad Institute of MIT and Harvard, Cambridge, USA

<sup>7</sup>Harvard Data Science Initiative, Cambridge, USA

‡Corresponding author. Email: [marinka@hms.harvard.edu](mailto:marinka@hms.harvard.edu)

\*Equal contribution

**There are more than 7,000 rare diseases, some affecting 3,500 or fewer patients in the US. Due to clinicians' limited experience with such diseases and the heterogeneity of clinical presentations, approximately 70% of individuals seeking a diagnosis today remain undiagnosed. Deep learning has demonstrated success in aiding the diagnosis of common diseases. However, existing approaches require labeled datasets with thousands of diagnosed patients per disease. Here, we present SHEPHERD, a few shot learning approach for multi-faceted rare disease diagnosis. SHEPHERD performs deep learning over a biomedical knowledge graph enriched with rare disease information to perform phenotype-driven diagnosis. Once trained, we show that SHEPHERD can provide clinical insights about real-world patients. We evaluate SHEPHERD on a cohort of N = 465 patients representing 299 diseases (79% of genes and 83% of diseases are represented in only a single patient) in the Undiagnosed Diseases Network. SHEPHERD excels at several diagnostic facets: performing causal gene discovery (causal genes are predicted at rank = 3.56 on average), retrieving “patients-like-me” with the same causal gene or disease, and providing interpretable characterizations of novel disease presentations. We additionally examine SHEPHERD on two other real-world cohorts, MyGene2 (N = 146) and Deciphering Developmental Disorders Study (N = 1,431). SHEPHERD demonstrates the potential of deep learning to accelerate rare disease diagnosis and has implications for using deep learning on medical datasets with very few labels.**

## Main

Rare diseases affect 300-400 million people worldwide, yet each disease has a very low prevalence, involving no more than 50 per 100,000 individuals [1–3]. Due to the low prevalence of rare diseases, most front-line clinicians lack firsthand experience, resulting in numerous specialty referrals and expensive clinical workups for patients across multiple years and institutions. Furthermore, patients with the same disease can present with variable symptoms, disease severity, and age of onset [4]. Such challenges make rare disease diagnosis extremely difficult; approximately 70% of individuals seeking a diagnosis remain undiagnosed, and the genes underlying up to 50% of Mendelian conditions are unknown [5,6]. These diagnostic delays can lead to redundant testing or unnecessary medical procedures, inappropriate or delayed disease management, and irreversible disease progression if the time window for intervention is missed.

Machine-assisted diagnosis offers the opportunity to shorten diagnostic delays for rare disease patients. Several strategies have been developed to automatically analyze patients' genetic and phenotypic data to aid diagnosis. Genotype-based approaches focus on leveraging variant frequency and predicted pathogenicity to identify disease-causing variants [7–9]. Phenotype-based approaches prioritize genes by analyzing a patient's facial image [10–15] or by comparing a patient's set of phenotypic abnormalities to a knowledge base containing associations between phenotypes, genes, and diseases [16–20]. Other approaches combine genotype and phenotype-based approaches through Bayesian reasoning [21, 22] or by training machine learning models to combine multiple handcrafted features [23–28]. Automated diagnosis pipelines leveraging genotyping and phenotyping methods have improved diagnostic yields across a range of rare diseases [29, 30].

Advances in deep learning have considerably improved diagnostic accuracy in other clinical areas [31–40], achieving near-expert clinical accuracy for common diseases [41–43]. These methods offer several benefits: they can automatically learn valuable features from patient cohort data and integrate multimodal phenotypic and genomic data into a shared feature space. Despite the promise of deep learning approaches, there have been limited attempts to leverage deep learning methods to diagnose rare genetic conditions. While deep learning approaches exist for image-based diagnosis [10, 11], DeepPVP, which leverages a feedforward network trained on handcrafted phenotypic and genotypic features, is the only one that operates over patient phenotype terms [44]. Deep learning methods for rare disease diagnosis are lacking because of the data scarcity problem.

Training deep learning models requires high-quality labeled data with thousands of diagnosed patients per disease. Yet, rare disease datasets are three orders of magnitude smaller. The

low prevalence of rare diseases makes it difficult to obtain datasets of sufficient size for deep learning, even with manual expert curation. Training deep learning models on datasets with smaller sample sizes can impact their generalizability. Due to each rare disease's heterogeneity and low prevalence, models are unlikely to have seen patients with the same (or similar) genetic disorders during training. Deep learning approaches for rare disease diagnosis must be able to extrapolate beyond the training distribution to novel genetic conditions and atypical disease presentations. Deep learning approaches that leverage medical knowledge are needed to overcome the limitations of traditional supervised deep learning methods in this limited data setting.

Here, we introduce SHEPHERD, a deep learning approach for multi-faceted diagnosis of patients with rare genetic conditions. SHEPHERD inputs patient phenotype terms and an optional list of candidate genes and operates at multiple points throughout the rare disease diagnosis process to perform causal gene discovery, retrieve “patients-like-me” with similar genetic and phenotypic features, and provide interpretable names for novel disease presentations. To overcome the limitations of supervised learning, SHEPHERD performs label-efficient training by (1) training primarily on simulated rare disease patients and (2) incorporating medical knowledge of known phenotype, gene, and disease associations via knowledge-guided deep learning. The simulated patients are created using an adaptive simulation approach that generates realistic rare disease patients with varying numbers of phenotype terms and candidate genes [45]. Knowledge-guided learning is achieved by training a graph neural network to represent a patient (specifically, the patient's presenting phenotypic features) about other phenotypes, genes, and diseases. When a new patient arrives, SHEPHERD produces a mathematical representation (*i.e.*, embedding) of the patient in the latent space such that the patient is embedded near the patient's causal gene(s), disease, and other patients with the same causal gene(s) or disease, and far from irrelevant genes and diseases and other patients with different diseases. Using SHEPHERD's embedding space optimized for rare disease diagnosis, SHEPHERD can nominate genes and diseases for every patient, even when no other patients are known to be diagnosed with the same disease. Unlike existing methods that rely on handcrafted features, SHEPHERD learns patient representations informed by medical knowledge directly from patient phenotype terms to enable rare disease diagnosis with few (or zero) labeled examples.

We evaluate SHEPHERD on an external cohort of patients in the Undiagnosed Diseases Network (UDN) [46], a nationwide initiative with 12 clinical sites in the US tasked with diagnosing patients with rare, difficult-to-diagnose genetic conditions. In addition to the multi-site UDN co-

hort, our external evaluation includes a nationwide MyGene2 patient cohort. SHEPHERD performs granular, phenotype-based causal gene discovery by ranking candidate genes from bioinformatics pipelines. We find that SHEPHERD ranks the correct gene first in 40% of patients spanning 16 disease areas, improving diagnostic efficiency by at least twofold compared to a non-guided baseline. In addition, SHEPHERD nominates the correct diagnosis for patients with atypical presentations or novel diseases, ranking the correct gene among the top five predictions for 77.8% of those hard-to-diagnose patients. SHEPHERD excels in diagnosing patients with novel genetic conditions, ranking up to 86% of patients the same as or better than domain-specific approaches. By testing SHEPHERD on each disease area, clinical site, and year of diagnosis, we find that SHEPHERD has sustained performance over time and across diseases and clinical sites in the UDN. Further, SHEPHERD generates patient representations that capture patient similarity (Adjusted Mutual Information = 0.304) and enable retrieval of “patients-like-me” with similar genetic conditions. Finally, SHEPHERD can provide interpretable characterizations of novel disease presentations. By describing novel diseases based on their similarity to known diseases, SHEPHERD can point clinical researchers towards the most closely related diseases to investigate the novel disease in depth. For each diagnostic task, we illustrate SHEPHERD’s capabilities on patients in the Undiagnosed Diseases Network and provide an interactive tool to explore SHEPHERD’s predictions at <https://huggingface.co/spaces/emilyalsentzer/SHEPHERD>.

## Results

### Overview of the Undiagnosed Diseases Network patient cohort

We assemble a cohort of 465 patients in the Undiagnosed Diseases Network (UDN) with molecular diagnoses. Most patients are diagnosed with a single causal gene that explains their symptoms; 14 patients (3%) have two causal genes, and two patients (0.4%) have three causal genes. Most patients in the UDN receive an extensive clinical workup and whole genome or exome sequencing (Figure 1a). Sequencing data is analyzed with the involvement of clinicians and genetic counselors to identify candidate genes that harbor variants likely to explain the patient’s symptoms. Once one to five strong candidates are identified, causality is assessed by searching for genotype- and phenotype-matched individuals in human and animal databases or by introducing candidates into model organisms to determine in vivo impact [47].

Through this diagnostic process, patients are annotated with a set of Human Phenotype Ontology (HPO) phenotype terms describing their clinical features and a set of candidate genes that

may explain the patient's syndrome. Clinical experts additionally annotate diagnosed patients with an Online Mendelian Inheritance in Man (OMIM) identifier describing their disease (if available). Each patient is characterized by 23.9 HPO terms on average (SD = 16.1; Figure 1c). The candidate genes are patient-specific and include genes in which the patient has a mutation. For each patient, the diagnostic process creates two sets of candidate gene lists. The lists contain genes considered at two different phases in the UDN diagnosis pipeline (Figure 1a): VARIANT-FILTERED, a list produced by performing initial variant-based filtering of candidate genes, and EXPERT-CURATED. This list includes genes marked by clinical experts as strong candidates for the patient (Methods 2.1). The VARIANT-FILTERED gene lists are produced using Exomiser [24, 48], a variant-based tool used in parallel to existing pipelines at three UDN sites [47]. The two candidate gene lists contain 244.3 and 13.3 genes on average, respectively (SD = 244.0 and SD = 8.0; Figure 1c). Each gene list is input to SHEPHERD to predict the causal gene (*i.e.*, the gene harboring variants that cause the patient's disease) from both a long list of candidate genes derived from automated filtering (*i.e.*, VARIANT-FILTERED) and a short list of the strongest candidate genes that are more challenging to prioritize (*i.e.*, EXPERT-CURATED).

UDN patients have heterogeneous disease presentations: 378 unique genes and 299 unique diseases are represented in the cohort, and 48% of phenotype terms, 79% of genes, and 83% of diseases are represented in only a single patient (Figure 1d). This reinforces the need for machine learning models that can learn from sparsely labeled datasets. 11.4% patients have a diagnosis in common with at least one other patient. Patients with the same disease have only 67% of phenotype terms in common on average (SD = 43%), and the closest shared ancestor (*i.e.*, lowest common ancestor) in Human Phenotype Ontology between their phenotype terms is 2.67 hops away on average (SD = 0.81). In addition, 7% of patients have novel genetic diseases, and only 28% of each patient's phenotypic features have any known association with the causal gene on average (SD = 21%). The assembled cohort of UDN patients has been evaluated at 12 clinical sites across the United States (Figure 1e). While 75.9% of patients are under five years old, patients can present to the UDN with suspected genetic diseases in their 40s or 50s (Figure 1f). Most patients present with neurological symptoms but can exhibit cardiac, musculoskeletal, rheumatic, and many other symptoms (Figure 1g). Due to the lag between starting the process at the UDN and receiving the diagnosis, most patients included in the analysis were evaluated by UDN clinicians in 2016-2018 (Figure 1h). The phenotypic heterogeneity and presence of novel and atypical diseases pose a challenge for diagnosis, requiring diagnostic technology that can accommodate previously unseen

phenotypes, genes, and diseases and leverage knowledge beyond direct gene, phenotype, and disease associations (Supplementary Figure S1). The UDN patients represent a diverse, independent cohort used exclusively for model evaluation. Importantly, these patients are not used to train SHEPHERD.

### **Overview of SHEPHERD algorithm**

SHEPHERD takes a set of patient's phenotype terms and candidate disease(s) or candidate gene(s) harboring causal variants as input and performs multi-faceted diagnosis of the patient to identify causal genes, retrieve "patients-like-me" with the same causal gene or disease, and provide interpretable characterizations of novel disease presentations (Figure 1b). SHEPHERD can integrate into the rare disease diagnostic process workflow at multiple points: (1) to find similar patients after the patient's clinical workup, (2) to identify strong candidate causal genes after the initial sequencing analysis or in conjunction with the clinical case review, and (3) to characterize the patient's disease and find similar patients for experimental or cohort validation after candidate causal genes are identified (Figure 1a-b).

SHEPHERD is a few shot geometric deep learning approach for rare disease diagnosis. Few-shot learning, which can make predictions when very few (if any) labeled data points are available, is central to rare disease diagnosis because of the low prevalence of each disease. Key to SHEPHERD's ability to provide diagnostic prediction when zero or at most a few labeled (diagnosed) patients per disease are available is to use a biomedical knowledge graph containing gene, phenotype, and disease relationships. SHEPHERD represents each patient as a subgraph of phenotype terms in the knowledge graph (Methods 1). It leverages a graph neural network to jointly embed each patient's phenotype subgraph and candidate genes or diseases into a latent representation space such that the generated embeddings are informed by the structure of the knowledge graph, and patients are embedded nearby their causal gene(s), disease(s), and other similar patients (Figure 2a-b). Further, SHEPHERD uses an attention mechanism to aggregate each patient's phenotype terms to generate a patient embedding, which allows for inspection of the attention weights to assess the contribution of each phenotypic feature to the prediction.

SHEPHERD is trained in a two-step process to learn embeddings of biomedical concepts and patients with rare genetic diseases. First, SHEPHERD is pretrained via self-supervised learning to embed genes, phenotypes, and diseases by predicting the relationships (structure) of the biomedical knowledge graph (Figure 2a). This step produces compact embeddings that can be adapted for



a range of analyses and are generalizable by accounting for complementarity between diseases. Then, using the pretrained model as initialization, SHEPHERD is trained for multi-faceted diagnosis of patients with rare diseases via a novel objective function (Figure 2b; Methods 3). We train SHEPHERD in a disease-stratified manner (*i.e.*, in which patients with the same disease are assigned either to the training or validation set, but not both) to enable SHEPHERD to generalize to diseases unseen during training.

Due to the scarcity of data for patients with rare diseases, we leverage simulated but realistic rare disease patients for training SHEPHERD (Figure 2c). We train SHEPHERD on a cohort of more than 40,000 synthetic rare disease patients representing over 2,000 rare diseases in Orphanet (Methods 2.4). The simulated patients were generated using an approach designed to generate realistic rare disease patients grounded in medical knowledge [45]. The synthetic cohort is essential for training SHEPHERD, as it is considerably larger, more diverse, and more representative of phenotype and genotype heterogeneity than any real-world dataset of rare disease patients (Figure 2c) [45]. This dataset, together with knowledge-guided learning on the rare disease knowledge graph, enables deep learning for rare disease diagnosis. A notable byproduct of training the model on synthetic data is that SHEPHERD's model can be publicly released without the risk of exposing patient information [49]. After training, SHEPHERD can be further trained on real-world patient cohorts or leveraged directly for rare disease diagnosis.

We leverage real patient data from three cohorts in this study (Figure 2d): (1) the UDN patient cohort (Methods 2.1); (2) a cohort of 146 patients from MyGene2, an online portal through which families with rare genetic conditions can share their health information to connect with clinicians and other patients [50] (Methods 2.2); (3) a cohort of 1,431 patients derived from the Deciphering Developmental Disorders Study, an initiative from the United Kingdom and Ireland designed to diagnose patients with undiagnosed developmental disorders [51] (Methods 2.3). Results are described in the following sections.

### **SHEPHERD can perform causal gene discovery**

A critical step in rare disease diagnosis is identifying the gene(s) that are strong candidates for causing the patient's syndrome (Figure 1a). Given a patient's set of phenotype terms and a list of genes in which the patient has a mutation, SHEPHERD predicts genes that harbor variants most likely to explain the patient's presenting symptoms. SHEPHERD produces a score for each candidate gene in the patient that fuses two complementary aspects of information: an embedding-

based metric that captures the global network topology and a network-based metric computed using knowledge graph distance that captures local network information (Methods 3.3). We use SHEPHERD to prioritize genes found in both the EXPERT-CURATED and VARIANT-FILTERED candidate gene lists (Methods 2.1). In both instances, SHEPHERD performs granular prioritization by refining lists of patients' candidate genes output by bioinformatics pipelines. For this analysis, we leverage patients from three cohorts: the simulated, MyGene2, and DDD cohorts are used for training, and the UDN cohort is used for validation.

We report SHEPHERD's performance in causal gene discovery as the average recall at  $k$ , defined as the number of causal genes correctly predicted in the top  $k$  ranked genes on average for all patients in the cohort. On the EXPERT-CURATED gene lists, SHEPHERD ranks the patient's causal gene first in 40% of UDN patients, achieving a recall of 0.69 when  $k = 3$  and 0.85 when  $k = 5$  on average (Figure 3a). On the much longer VARIANT-FILTERED gene lists, SHEPHERD achieves an average recall of 0.21, 0.38, and 0.48 for  $k = 1, 5,$  and  $10,$  respectively (Figure 3d).

We find no significant difference in performance across UDN sites throughout the US, patients with varying presenting symptoms, and the year of evaluation by UDN clinicians (Figure 3b-c, Supplementary Figure S2a, Supplementary Figure S3a-c) on both the EXPERT-CURATED and VARIANT-FILTERED gene lists. These results indicate that SHEPHERD can generalize across clinical sites and diseases over time. Furthermore, we find that SHEPHERD's performance does not correlate with the number of annotated phenotype terms for each patient (Spearman's  $p = 0.02$  and  $p = -0.11$  for EXPERT-CURATED and VARIANT-FILTERED lists respectively; Supplementary Figure S2c and Supplementary Figure S3e). Finally, we evaluate SHEPHERD's performance as a function of the prevalence of the rare disease. We leverage the number of submissions to ClinVar as a proxy for prevalence. We find that SHEPHERD's performance does not strongly correlate with the prevalence of the genetic condition (Spearman's  $p = -0.17$  and  $p = -0.16$  for EXPERT-CURATED and VARIANT-FILTERED lists respectively; Supplementary Figure S2d and Supplementary Figure S3f). SHEPHERD's ability to generalize represents an important capability because rare disease patients are heterogeneous, and developing separate predictive models that perform well for each patient subgroup is not feasible due to the low prevalence of the disorders.

We evaluate SHEPHERD against ten baseline approaches (Methods 5.2). We select a network science algorithm and two supervised machine learning approaches as benchmarks to quantify the advantages of SHEPHERD's graph neural network approach. We also identify six domain-specific existing algorithms developed for causal gene discovery that leverage information the-



ory (Phrank [16], PhenIX [24], and ERIC [25]), likelihood ratios (LIRICAL [21]), shallow graph embeddings (CADA [19]), and information-theoretic and random walk methods (HiPhive [24]). SHEPHERD performs comparably or significantly better than all benchmarking approaches on the EXPERT-CURATED and VARIANT-FILTERED gene lists (Figure 3a,d). SHEPHERD is comparable only to HiPhive, implemented in Exomiser and LIRICAL, two of the most widely used tools in the rare disease diagnosis community. SHEPHERD significantly outperforms the other domain-specific approaches in retrieving the causal gene first by up to 23.5% and 7.7% of patients on the EXPERT-CURATED and VARIANT-FILTERED gene lists, respectively, and outperforms the machine learning approaches by at least 28.4% and 20.0% of patients on the EXPERT-CURATED and VARIANT-FILTERED gene lists, respectively.

SHEPHERD's strong performance demonstrates that SHEPHERD can complement existing variant-based approaches for gene prioritization while leveraging the extensive knowledge sources of gene-phenotype associations. Using SHEPHERD, clinicians would need to evaluate 1,026 genes from the EXPERT-CURATED lists or 18,005 genes from the VARIANT-FILTERED lists to arrive at the causal gene for all 465 UDN patients. In contrast, with non-guided ranking, clinicians would need to evaluate a total of 2,231 EXPERT-CURATED genes or 27,727 VARIANT-FILTERED genes, suggesting that SHEPHERD has the potential to improve diagnostic efficiency by 2.2-times and 1.5-times, respectively. Compared to the best domain-specific approaches, LIRICAL and HiPhive, SHEPHERD reduces the number of genes clinicians need to consider by 97 (8.6%) and 5,495 (23.3%) on the EXPERT-CURATED and VARIANT-FILTERED gene lists, respectively (LIRICAL), and by 1,878 (9.4%) on the VARIANT-FILTERED gene list (HiPhive).

### **SHEPHERD can diagnose patients with atypical and novel genetic diseases**

Patients in the UDN have atypical or novel disease presentations, which makes them challenging to diagnose because there are no direct associations between patients' genes, symptoms, and the correct diagnosis. Consequently, the lack of direct linkage between patients' phenotypic features and the correct diagnosis (causal genes) means that a lookup against medical knowledge bases is ineffective for diagnosis. We find that SHEPHERD can identify the causal gene even when the patient's presenting phenotypic abnormalities are multiple hops away from the gene causing the disease in the knowledge graph. For 77.8% of patients whose phenotype terms are far away from their causal genes in the knowledge graph (i.e., more than two hops away), SHEPHERD identifies the correct causal gene among its top five predictions from the EXPERT-CURATED gene list.

No strong correlation exists between SHEPHERD's performance and the distance between the patient's phenotype terms and causal gene (Supplementary Figure S2b, Supplementary Figure S3d;  $R^2 = 0.102$ , Spearman's  $p = 0.37$  and  $R^2 = 0.0004$ , Spearman's  $p = 0.12$  for the EXPERT-CURATED and VARIANT-FILTERED gene lists, respectively).

We evaluate SHEPHERD against the domain-specific models in four hard-to-diagnose scenarios (Figure 3e). We identify patients from the UDN whose causal genes lack known associations with phenotype terms or diseases in the literature (based on our rare disease knowledge graph) and who have been identified by UDN experts as having novel disease genes or novel diseases. SHEPHERD achieves win rates (*i.e.*, ranks the causal gene the same or higher) of up to 82% and 83% for patients whose causal genes have no known phenotype or disease associations, respectively, on the EXPERT-CURATED gene lists. On the VARIANT-FILTERED gene lists, the win rates are up to 80% and 74%, respectively. SHEPHERD achieves win rates of up to 67% and 83% for patients with a novel disease or novel disease gene, respectively, according to UDN experts on the EXPERT-CURATED gene lists, and up to 86% on the VARIANT-FILTERED gene lists. The only subset of patients for which a baseline performs slightly better than SHEPHERD consists of patients with novel disease genes, according to human experts in the UDN. In all other scenarios, SHEPHERD outperforms all baseline approaches, demonstrating SHEPHERD's ability to diagnose patients with atypical and novel genetic diseases.

We further demonstrate the use of SHEPHERD for patients diagnosed with atypical presentation of a known disease or a novel syndrome through two case studies on patients from the UDN. Patient UDN-P1 (Figure 4a; SHEPHERD Tool Tab 1, Patient UDN-P1) received a diagnosis for POLR3-related leukodystrophy three years after acceptance into the UDN. While the involvement of gene *POLR3A* with leukodystrophy (MIM:607694) is known, the patient's case was challenging due to her atypical clinical presentation. Several of her presenting clinical features, including lack of tear production, premature adrenarche, laryngeal cleft, hearing loss, and high blood pressure, are not typical of leukodystrophy. Further, only 28.3% (13 out of 46) of the patient's phenotype terms are directly linked to *POLR3A* in the knowledge graph, and the patient phenotype terms are 1.98 hops away from the causal gene in the knowledge graph on average. The *POLR3A* gene is associated with five other diseases, and 93.7% (192 out of 205) of phenotype terms directly linked to *POLR3A* are not found in the patient, further complicating the diagnosis. Despite this atypical disease presentation, SHEPHERD identifies the patient's causal gene in the top 1 out of 17 and 86 candidate genes in the EXPERT-CURATED and VARIANT-FILTERED gene lists, respectively. Strik-

ingly, SHEPHERD can disambiguate diseases by optimally up- and down-weighting phenotypic features using an attention mechanism and correctly down-weights phenotypic features that are atypical of leukodystrophy.

SHEPHERD can also identify strong candidate genes for patients with novel uncharacterized syndromes. Patient UDN-P2 (Figure 4b; SHEPHERD Tool Tab 1, Patient UDN-P2) was accepted into the UDN with congenital hypotonia and developmental delay. While no diagnosis was identified in the primary genomic and clinical evaluation, the patient was diagnosed three years later with a novel *PRKAR1B*-related neurodevelopmental disorder. The *PRKAR1B* gene is not associated with known diseases. None of the 21 phenotype terms directly linked to *PRKAR1B* are found in the patient, and the average shortest path length from the patient's phenotype terms to the causal gene is 2.4. Nevertheless, SHEPHERD identifies the suspected causal gene among the top 3 in the EXPERT-CURATED candidate list and the top 4 in the VARIANT-FILTERED candidate list, illustrating how SHEPHERD can assist in recognizing novel genetic diseases.

### **SHEPHERD learns meaningful patient representations that capture patient similarity**

Another critical consideration for rare disease diagnosis is finding patients that share the same disease or causal gene, commonly referred to as “patients-like-me” [52] (Figure 1a). Starting from a set of patient phenotype terms, SHEPHERD flags other patients in the cohort with similar genetic diseases suitable for follow-up diagnostic analysis. Concretely, SHEPHERD finds similar patients through a deep embedding scorer optimized to represent patients with the same causal genes or disease as nearby points in the embedding space. For this analysis, we leverage patients from three cohorts: the simulated cohort is used for training, and the UDN and MyGene2 cohorts are used for validation.

SHEPHERD represents each patient as a point in the embedding space colored by the disease category of their diagnosed disease (Figure 5). The categories correspond to the 33 disease categories outlined in Orphanet (Methods 2). Robust clustering of patients by disease area (AMI = 0.304;  $p$ -value < 0.01) shows that SHEPHERD generates the embedding space that meaningfully captures patient relationships that can directly answer “patients-like-me” queries. Remarkably, even though SHEPHERD is trained on simulated patients, it generalizes to real-world UDN and MyGene2 cohorts, revealing disease-enriched regions in the embedding space where real-world patients are positioned nearby simulated patients with the same disease area (Supplementary Figure S4).

To further evaluate patient embeddings, we compare embedding distances between patients diagnosed with either the same or different disease (*i.e.*, comparing diagonal vs. off-diagonal entries, Figure 5b). We find that distances between patients of the same category are significantly smaller than between patients of different categories ( $p$ -value  $< 1 \times 10^{-10}$  across all disease categories; Mann-Whitney test), which indicates that SHEPHERD captures the similarity between patients with similar disease presentations. We also observe several distinct clusters of disease categories in the embedding space (Figure 5b; Supplementary Figure S6). For example, patients with neoplastic diseases and gastroenterologic diseases cluster together. Similarly, patients with hematologic and hepatic diseases and patients with odontologic and renal diseases cluster together in the embedding space. These clusters represent real co-occurrences of symptoms in disease presentations. For instance, patients with odontologic diseases, atypical dentin dysplasia, and orofacioidigital syndrome I, have both orofacial and renal disease presentations. Atypical dentin dysplasia is caused by a mutation in *SMOC2*, a matricellular protein involved in both craniofacial development and kidney fibrosis [53, 54]. Orofacioidigital syndrome I is caused by a mutation in *OFDI*, which is involved in organogenesis and plays a vital role in the normal growth of orofacial and kidney tissues [55, 56]. These relationships reflect that diseases often involve multiple organ systems and indicate that the embedding space can capture the relationship between patients with similar symptoms even when their diagnoses differ.

### **SHEPHERD can identify “patients-like-me” with similar genetic diseases**

We next examine SHEPHERD’s ability to identify “patients-like-me” from a large cohort of rare disease patients. We either rank all simulated, UDN, and MyGene2 patients (UDN-P3 and UDN-P4 cases) or all UDN and MyGene2 patients (UDN-P5 and UDN-P6 cases; Figure 5c; SHEPHERD Tool Tab 2) to identify patients most similar to the query UDN patient. We locate each query patient and all similar patients with the same causal gene in SHEPHERD’s embedding space and find that patients with the same causal gene are embedded nearby. In all four patient cases, SHEPHERD retrieves patients with the same causal gene and disease as the query patient among the top 5 predictions. Patients ranked above the patient with the same causal gene have very similar disease presentations to the query patient. For UDN-P4 and UDN-P5, the patients have a variant of the same disease caused by a different gene (Figure 5c). For UDN-P6, patients with Coffin-Siris syndrome 8 (ranked first) and GATAD2B-associated syndrome (ranked second) both exhibit impaired intellectual development, hypotonia, feeding difficulties, and hypertelorism,

among other phenotypic abnormalities. For UDN-P3, patients with X-linked intellectual disability due to *GRIA3* (ranked first) and Coffin-Lowry syndrome (ranked second) share impaired intellectual development, seizures, scoliosis, and other phenotypic abnormalities.

The most similar patients identified by SHEPHERD do not necessarily have the most phenotype terms in common with the query patient. This reflects SHEPHERD's ability to capture phenotypic similarity rather than just calculating a direct overlap in phenotype terms, typical of some information-theoretic approaches used in practice. In particular, patients that share the same causal gene have two to four phenotype terms in common. Only 10.0%, 9.0%, 26.6%, and 7.7% of the phenotype terms found in query patients UDN-P3, UDN-P4, UDN-P5, and UDN-P6 are also found in the most similar genotype-matched individual respectively. In contrast, patients with the most phenotype terms in common with the query are ranked at positions 366, 463, 41, and 16, respectively. For example, one patient shares 10 phenotype terms with UDN-P6, which is 38.5% of UDN-P6's phenotypes, yet has a different causal gene and is ranked 16th. This capability of SHEPHERD to consider indirect, deep associations between genes and phenotypic features makes SHEPHERD highly complementary to graph theoretic techniques and statistical tests that can only score direct associations, which can be ineffective for poorly characterized diseases.

We next quantify SHEPHERD's ability to identify "patients-like-me" for each UDN patient from all patients in the real-world MyGene2 cohort. As before, we evaluate the average recall at  $k$ , here defined as the number of MyGene2 patients with the same causal gene as the query correctly predicted in the top- $k$  ranked patients on average for all UDN patients in the cohort. SHEPHERD ranks a patient with the same causal gene first in 11.5% of UDN patients, achieving a recall of 0.31, 0.43, 0.49, and 0.53 for  $k = 5, 10, 25,$  and  $50$ , respectively (Figure 5a). We compare SHEPHERD to Phrank, an alternative approach that can calculate phenotypic similarity. Phrank uses information theory to calculate the similarity between two sets of phenotype terms based on shared ancestors in the Human Phenotype Ontology. We find that SHEPHERD performs significantly better than Phrank in identifying "patients-like-me" (Mann-Whitney  $p = 0.04$ ). SHEPHERD ranks a patient with the same causal gene first for 7.4% more patients and reduces the number of patients that clinicians need to consider by 703 (17.2%) compared to Phrank.

Finally, we evaluate whether SHEPHERD embeds patients with the same disease (rather than gene) closer to each other than to patients with different diseases. Again, we compare UDN patients to MyGene2 patients. We find that embedding distances between patients diagnosed with the same disease are significantly smaller compared to patients with different diseases ( $p$ -value

$= 2.42 \times 10^{-8}$ ; Kolmogorov-Smirnov test; Supplementary Figure S5), further strengthening the evidence that SHEPHERD can capture similarities between different diseases with similar presenting symptoms, but can nevertheless differentiate patients that have the same diagnosed disease.

### **SHEPHERD provides an interpretable characterization of novel diseases**

In addition to supporting causal gene discovery and patients-like-me identification, SHEPHERD can help characterize novel clinical presentations through our current knowledge of rare diseases (Figure 1a). Given a patient's set of HPO phenotype terms, SHEPHERD provides an interpretable summary of the patient's disease based on its similarity to each disease in the KG. SHEPHERD produces a ranked list of all diseases using the embedding similarity between each disease and the patient's phenotype terms, which are then summarized to generate a distribution of similarities to disease categories. More concretely, SHEPHERD learns an embedding space in which the similarity between a patient and a disease is inversely proportional to the embedding distance between the patient and their diagnosed disease (Figure 6a). Aggregating SHEPHERD-generated similarities of individual diseases by their disease category enables interpretable characterization of the patient's disease. For example, a patient's presenting syndrome may be  $w_1\%$  similar to rare neurologic diseases,  $w_2\%$  similar to rare bone diseases,  $w_3\%$  similar to rare developmental defects during embryogenesis, etc. SHEPHERD can leverage gene-phenotype-disease associations to generate granular descriptions of a patient's disease. For this analysis, we leverage patients from two cohorts: the simulated cohort is used for training, and the UDN cohort is used for validation.

We observe that SHEPHERD learns to embed patients near diseases of the same category; on average, 45.7% of the top 10 ranked diseases with a known disease category belong to the same category as the patient's disease, which is nearly three times more than random expectation alone (16.4%). To evaluate SHEPHERD's ability to provide interpretable disease names for patients with known rare diseases, we first calculate the similarity between UDN patients and all diseases. This allows us to assess whether the patients are most similar to diseases that share the same disease category as the patient's disease (Figure 6a). Concretely, for each patient, we stratify patients by their primary disease category and calculate the average similarity of a patient to all disease nodes under each disease category. As expected, we find that patients tend to be most similar to diseases of the same disease category as their own. For example, patients with a rare bone disease are predicted to be most similar to diseases under the category of rare bone disease (13.0% similarity), followed by rare developmental defects during embryogenesis (10.2%), rare



inborn errors of metabolism (9.6%), and rare odontology diseases (8.2%). Similarly, patients with a disease categorized as a rare developmental defect during embryogenesis, a rare inborn error of metabolism, or a rare neurologic disease tend to be most similar to other diseases of the same category.

We examine two patients in depth to interrogate SHEPHERD's predictive capabilities for characterizing known rare diseases: UDN-P7 and UDN-P8. Patient UDN-P7 (Figure 6b; SHEPHERD Tool Tab 3, Patient UDN-P7) received a diagnosis for limb-girdle muscular dystrophy 3 (sarco-glycanopathy; MIM:608099) due to variants in *SGCA*. SHEPHERD compares the patient's clinical presentation to diseases across 19 disease categories and finds that the patient is most similar to rare neurologic diseases, as expected. From SHEPHERD's predictions, two of the top five most similar diseases are other types of AR limb-girdle muscular dystrophy, and all five are related to muscular dystrophy. We compare SHEPHERD to a simple phenotypic search of the patient's HPO terms to generate a distribution of similarities to disease categories. This phenotype search approach can correctly identify the patient's disease as a rare neurologic disease but cannot produce disease-level rankings. Patient UDN-P8 (Figure 6b; SHEPHERD Tool Tab 3, Patient UDN-P8) was diagnosed four years after acceptance to the UDN with the bone disease spondyloepimetaphyseal dysplasia caused by a mutation in *RPLI3*. Again, SHEPHERD can ascertain the patient's symptoms are similar to other bone diseases; all top 5 ranked disorders are rare bone diseases with overlapping phenotype terms found in the query patient. In contrast, the phenotype search approach does not identify UDN-P8's disease as a rare bone disease; rather, it predicts that the patient has a disease due to a rare developmental defect during embryogenesis. These findings on our case studies of two patients with known rare diseases suggest that SHEPHERD can produce correct and granular hypotheses about a patient's rare disorder.

We also investigate SHEPHERD's hypotheses for two patients with novel genetic diseases, UDN-P9 and UDN-P10. UDN-P9 (Figure 6b; SHEPHERD Tool Tab 3, Patient UDN-P9) was diagnosed with *ATP5PO*-related Leigh syndrome caused by a novel mutation in *ATP5PO*, a gene previously unassociated with any disease [57]. As Leigh syndrome is a metabolic disorder with neuropathological features, SHEPHERD correctly identifies UDN-P9's disease is most similar to diseases under the categories of rare inborn errors of metabolism and rare neurological diseases. In contrast, the phenotype search method incorrectly predicts a tie between a disorder due to a rare inborn error of metabolism and a rare neoplastic disease, failing to label the patient's disease as a neurological disorder. Three of the top five diseases—combined oxidative phosphorylation

deficiency 39 (MIM:618397; ranked by SHEPHERD as #1), pyruvate dehydrogenase E3-binding protein deficiency (MIM:245349; ranked by SHEPHERD as #3), and combined oxidative phosphorylation defect type 26 (MIM:616672; ranked by SHEPHERD as #5)—are mitochondrial diseases affecting the same pathway as *ATP5PO* and result in a defect in the aerobic energy production. These diseases' causal genes co-localize with *ATP5PO* [58–61]. Combined oxidative phosphorylation deficiency 39 and combined oxidative phosphorylation defect type 26 are associated with neurological presentations of mitochondrial disease, including hypotonia, seizures, and features of Leigh syndrome [62]. The remaining two most similar diseases (ranked by SHEPHERD as #2 and #4) are rare neurologic diseases with phenotype terms identical to UDN-P9's. The causal gene, *CNP*, for the second-ranked disease, hypomyelinating leukodystrophy-20 (MIM:619071), is three hops away from *ATP5PO* in the physical protein interaction network [63, 64], suggesting that they may be functionally related [65–67] or operate together [68, 69] to mediate phenotypic features associated with UDN-P9's disease and hypomyelinating leukodystrophy-20.

Patient UDN-P10 (Figure 6b; SHEPHERD Tool Tab 3, Patient UDN-P10), is characterized by SHEPHERD as most similar to diseases under the categories of rare inborn errors of metabolism, rare hepatic disease, rare gastroenterological disease, and rare endocrine disease. These top categories are aligned with many of the patient's symptoms, particularly duodenal atresia, intestinal malrotation, pancreatic exocrine insufficiency, liver disease, and developmental delay. In contrast, the phenotype search approach predicts that the patient's disease is most similar to diseases due to rare developmental defects during embryogenesis. Three of the top five most similar individual diseases from SHEPHERD's outputs—Methylmalonic acidemia with homocystinuria type cblF (MIM:277380; ranked by SHEPHERD as #1), Neonatal hemochromatosis (MIM:231100; ranked by SHEPHERD as #2), and ALG8-CDG (MIM:608104; ranked by SHEPHERD as #4)—are also due to inborn errors of metabolism, and the diseases are associated with phenotypes that are similar to those seen in the patient, including abnormalities in liver and gastrointestinal function and developmental delay. Notably, the rare respiratory disease category is the third lowest-ranked category. UDN clinicians hypothesized that the patient's *GLYRI* variants cause a mislocalization of the cystic fibrosis conductance regulator (*CFTR*), which is associated with cystic fibrosis. While the patient has gastrointestinal and pancreatic symptoms similar to those in cystic fibrosis, the patient does not have any of the pulmonary features classic for that condition. Such granularity in SHEPHERD's predictions is a reflection of SHEPHERD's ability to differentiate between diseases despite partially overlapping phenotypes and causal genes sharing the same pathway.

## Discussion

We present SHEPHERD, a deep learning approach for multi-faceted rare disease diagnosis. SHEPHERD overcomes limitations of supervised deep learning by (1) incorporating biomedical knowledge into the model via geometric deep learning on a knowledge graph, (2) leveraging label-efficient learning to align patients with genes and phenotypes, and (3) training on a large dataset of simulated rare disease patients in a disease-stratified manner. SHEPHERD generalizes across phenotype terms, genes, and diseases and performs well on patients with heterogeneous clinical presentations and novel genetic conditions (Supplementary Figure S1). Further, the model leverages an attention mechanism to generate phenotype-based patient embeddings; the attention weights can be inspected to provide insights into the contribution of each phenotype term to the patient-specific prediction. As shown in the evaluations on external multi-site patient cohorts with heterogeneous disease presentations, SHEPHERD supports generalizable multi-faceted diagnosis of rare genetic diseases.

A unique feature of SHEPHERD is its ability to generate clinico-genetic representations of patients with rare genetic diseases. SHEPHERD represents patient phenotype terms as subgraphs and candidate genes and diseases as nodes in the knowledge graph. The graph neural network then generates embeddings by considering direct and indirect gene-phenotype-disease associations that are multiple hops away from each other in the knowledge graph. While many existing approaches rely exclusively on known phenotype-gene-disease associations [16, 18], leveraging indirect associations is essential for diagnosing patients with novel or atypical genetic conditions (Supplementary Figure S2b, Supplementary Figure S3d). Further, subgraphs provide a flexible mathematical definition for modeling sets of the patient phenotype terms. Rather than modeling each phenotype term individually [19], SHEPHERD encodes patients as a structured object (*i.e.* a subgraph) and considers the co-occurrence of phenotypic features when diagnosing rare diseases. This joint modeling of patient phenotypic features is essential for identifying genetic mutations with pleiotropic effects [70–72].

SHEPHERD demonstrates that models trained on simulated patient datasets apply to real-world clinical applications. While simulated data is increasingly used to augment training datasets for improving robustness and generalizability [49, 73–77], here we primarily use simulated patients to train SHEPHERD. Simulated data are not just an additional asset, but a critical necessity for training deep learning models to generate predictions on rare diseases with scarce labeled diagnoses. The synthetic patients are generated by a simulator [45] based on clinico-genetic knowledge. Train-

ing on simulated data mitigates concerns regarding privacy breaches, in which specific individuals can be identified from the training data [78, 79]. Hence, a fully trained SHEPHERD model can be publicly released without privacy concerns.

There are several extensions to this work. Our method relies on a knowledge graph of disease, gene, and phenotype associations. Other sources of information, such as variant-level information or databases of model organism phenotype-gene associations, can be incorporated as well [80]. SHEPHERD's knowledge graph includes gene-phenotype-disease associations and can be extended to include information from research literature [26]. SHEPHERD's phenotype-based approach can also be combined with variant-based prioritization approaches, such as those used in Exomiser [24], for even stronger causal gene discovery performance. The graph neural network underlying SHEPHERD can be extensible to multi-modal data types. For example, gene co-expression data or textual descriptions of diseases can be incorporated as node features. While efforts like the UDN are critical for establishing diagnoses for rare disease patients, they alone cannot address the rare disease burden. Approaches like SHEPHERD can help identify and diagnose rare disease patients using claims data, electronic health records, and other data types. SHEPHERD's ability to characterize a patient's clinical presentation can be used to identify sub-specialists who should review the patient's case for the diagnostic recommendation.

Our study has a few limitations. First, continually updating the knowledge graph with gene-phenotype-disease associations can improve SHEPHERD's performance. To this end, the knowledge graph curation and processing approaches are fully reproducible, and the graph can be automatically updated as new data become available [81]. Second, the still-undiagnosed UDN patients may be more challenging than the already-diagnosed ones SHEPHERD was tested on. There are two categories of still-undiagnosed patients: patients admitted to the UDN years ago who have yet to receive a diagnosis due to sequencing limitations (*e.g.*, hard-to-detect variant types such as short tandem repeats or structural variants, missing second variants in recessive disorders, variants that lie in difficult-to-sequence regions or are masked due to biases in the human reference genome and ancestral genomes [82]), and patients recently admitted to the UDN. SHEPHERD can be evaluated on the still-undiagnosed patients whose causal variants will be detectable by deep whole genome sequencing. The lack of an observed drop in SHEPHERD's performance for recently diagnosed patients suggests that data leakage (*i.e.*, information about older diagnoses being incorporated into the knowledge graph) has not occurred, evidently avoiding the bias that would otherwise cause overfitting of the model to the training data.

SHEPHERD shows the utility and impact of deep learning for diagnosing rare disease patients. While other deep learning-powered diagnostic systems focus on common diseases for which large labeled datasets exist, this study shows how deep learning can be used for rare diseases. Diagnostic process requires collaborations among bioinformaticians, clinicians, and genetic counselors. Reviewing a single case can take many hours of a many-person team over days or weeks. SHEPHERD can substantially reduce the number of genes that human experts need to consider to provide a molecular diagnosis and identify patients with similar genetic conditions, even before they have undergone genetic sequencing. Deep learning-based diagnostic strategies like SHEPHERD create new opportunities to shorten the diagnostic odyssey for rare diseases.

**Data availability.** All data used in the paper, including the rare disease knowledge graph, simulated, MyGene2, and DDD cohorts, and the final and intermediate results of the analyses are shared with the research community at <https://zitniklab.hms.harvard.edu/projects/SHEPHERD>. While the UDN dataset cannot be released due to privacy concerns, anonymized UDN data has been deposited in dbGaP (accession phs001232) and PhenomeCentral. Phenotypes and causal variants and genes related to UDN diagnoses are also shared publicly in ClinVar at <https://www.ncbi.nlm.nih.gov/clinvar/submitters/505999>. The UDN study is approved by the NIH IRB Protocol 15HG0130. All patients accepted to the UDN provide written informed consent to share their data across the UDN.

**Code availability.** Python implementation of the methodology developed and used in the study is available via the project website at <https://zitniklab.hms.harvard.edu/projects/SHEPHERD>. The code to reproduce results, documentation, and examples are at <https://github.com/mims-harvard/SHEPHERD>. We provide an interactive tool to explore SHEPHERD's at <https://huggingface.co/spaces/emilyalsentzer/SHEPHERD>.

**Acknowledgements.** We thank Kimberly LeBlanc for reviewing our work to ensure we follow UDN data privacy protocols. E.A. is supported by a Microsoft Research PhD Fellowship. M.L. is supported by T32HG002295 from the National Human Genome Research Institute and a National Science Foundation Graduate Research Fellowship. M.Z. gratefully acknowledges the support by NSF under Nos. IIS-2030459 and IIS-2033384, US Air Force Contract No. FA8702-15-D-0001, and awards from Harvard Data Science Initiative, Amazon Research, Bayer Early Excellence in Science, AstraZeneca Research, and Roche Alliance with Distinguished Scientists. UDN research reported in this manuscript was supported by the NIH Common Fund, through the Office of Strategic Coordination/Office of the NIH Director under the following award numbers: U01HG007709, U01HG010219, U01HG010230, U01HG010217, U01HG010233, U01HG010215, U01HG007672, U01HG007690, U01HG007708, U01HG007703, U01HG007674, U01HG007530, U01HG007942, U01HG007943, U01TR001395, U01TR002471, U54NS108251, and U54NS093793. This study also makes use of data generated by the DECIPHER community. A full list of centres who contributed to the generation of the data is available from <https://deciphergenomics.org/about/stats> and via email from [contact@deciphergenomics.org](mailto:contact@deciphergenomics.org). DECIPHER is hosted by EMBL-EBI and funding for the DECIPHER project was provided by the Wellcome Trust [grant number WT223718/Z/21/Z].



The content is solely the responsibility of the authors and does not necessarily represent the official views of the National Institutes of Health and other funders.

**Authors contribution.** E.A., M.M.L., and S.K. retrieved and processed the UDN, MyGene2, and simulated patient data. E.A. and M.M.L. developed, implemented, and benchmarked SHEPHERD and performed detailed analyses of SHEPHERD's algorithm. E.A., M.M.L., I.K., and M.Z. designed the study. E.A., M.M.L., and M.Z. wrote the manuscript.

**Competing interests.** The authors declare no competing interests.

**Undiagnosed Diseases Network Consortium.** Undiagnosed Diseases Network: Maria T. Acosta, Margaret Adam, David R. Adams, Justin Alvey, Laura Amendola, Ashley Andrews, Euan A. Ashley, Mahshid S. Azamian, Carlos A. Bacino, Guney Bademci, Ashok Balasubramanyam, Dustin Baldridge, Jim Bale, Michael Bamshad, Deborah Barbouth, Pinar Bayrak-Toydemir, Anita Beck, Alan H. Beggs, Edward Behrens, Gill Bejerano, Hugo J. Bellen, Jimmy Bennet, Beverly Berg-Rood, Jonathan A. Bernstein, Gerard T. Berry, Anna Bican, Stephanie Bivona, Elizabeth Blue, John Bohnsack, Devon Bonner, Lorenzo Botto, Brenna Boyd, Lauren C. Briere, Elly Brokamp, Gabrielle Brown, Elizabeth A. Burke, Lindsay C. Burrage, Manish J. Butte, Peter Byers, William E. Byrd, John Carey, Olveen Carrasquillo, Thomas Cassini, Ta Chen Peter Chang, Sirisak Chanprasert, Hsiao-Tuan Chao, Gary D. Clark, Terra R. Coakley, Laurel A. Cobban, Joy D. Cogan, Matthew Coggins, F. Sessions Cole, Heather A. Colley, Cynthia M. Cooper, Heidi Cope, William J. Craigen, Andrew B. Crouse, Michael Cunningham, Precilla D'Souza, Hongzheng Dai, Surendra Dasari, Joie Davis, Jyoti G. Dayal, Matthew Deardorff, Esteban C. Dell'Angelica, Katrina Dipple, Daniel Doherty, Naghmeh Dorrani, Argenia L. Doss, Emilie D. Douine, Laura Duncan, Dawn Earl, David J. Eckstein, Lisa T. Emrick, Christine M. Eng, Cecilia Esteves, Marni Falk, Liliana Fernandez, Elizabeth L. Fieg, Paul G. Fisher, Brent L. Fogel, Irman Forghani, William A. Gahl, Ian Glass, Bernadette Gochuico, Rena A. Godfrey, Katie Golden-Grant, Madison P. Goldrich, Alana Grajewski, Irma Gutierrez, Don Hadley, Sihoun Hahn, Rizwan Hamid, Kelly Hassey, Nichole Hayes, Frances High, Anne Hing, Fuki M. Hisama, Ingrid A. Holm, Jason Hom, Martha Horike-Pyne, Alden Huang, Yong Huang, Wendy Introne, Rosario Isasi, Kosuke Izumi, Fariha Jamal, Gail P. Jarvik, Jeffrey Jarvik, Suman Jayadev, Orpa Jean-Marie, Vaidehi Jobanputra, Lefkothea Karaviti, Jennifer Kennedy, Shamika Ketkar, Dana Kiley, Gonench Kilich, Shilpa N. Kobren, Isaac S. Kohane, Jennefer N. Kohler, Deborah Krakow, Donna M. Krasnewich, Elijah

Kravets, Susan Korrick, Mary Koziura, Seema R. Lalani, Byron Lam, Christina Lam, Grace L. LaMoure, Brendan C. Lanpher, Ian R. Lanza, Kimberly LeBlanc, Brendan H. Lee, Roy Levitt, Richard A. Lewis, Pengfei Liu, Xue Zhong Liu, Nicola Longo, Sandra K. Loo, Joseph Loscalzo, Richard L. Maas, Ellen F. Macnamara, Calum A. MacRae, Valerie V. Maduro, Rachel Mahoney, Bryan C. Mak, May Christine V. Malicdan, Laura A. Mamounas, Teri A. Manolio, Rong Mao, Kenneth Maravilla, Ronit Marom, Gabor Marth, Beth A. Martin, Martin G. Martin, Julian A. Martínez-Agosto, Shruti Marwaha, Jacob McCauley, Allyn McConkie-Rosell, Alexa T. McCray, Elisabeth McGee, Heather Mefford, J. Lawrence Merritt, Matthew Might, Ghayda Mirzaa, Eva Morava, Paolo M. Moretti, Mariko Nakano-Okuno, Stan F. Nelson, John H. Newman, Sarah K. Nicholas, Deborah Nickerson, Shirley Nieves-Rodriguez, Donna Novacic, Devin Oglesbee, James P. Orengo, Laura Pace, Stephen Pak, J. Carl Pallais, Christina GS. Palmer, Jeanette C. Papp, Neil H. Parker, John A. Phillips III, Jennifer E. Posey, Lorraine Potocki, Barbara N. Pusey, Aaron Quinlan, Wendy Raskind, Archana N. Raja, Deepak A. Rao, Anna Raper, Genecee Renteria, Chloe M. Reuter, Lynette Rives, Amy K. Robertson, Lance H. Rodan, Jill A. Rosenfeld, Natalie Rosenwasser, Francis Rossignol, Maura Ruzhnikov, Ralph Sacco, Jacinda B. Sampson, Mario Saporta, Judy Schaechter, Timothy Schedl, Kelly Schoch, C. Ron Scott, Daryl A. Scott, Vandana Shashi, Jimann Shin, Edwin K. Silverman, Janet S. Sinsheimer, Kathy Sisco, Edward C. Smith, Kevin S. Smith, Emily Solem, Lilianna Solnica-Krezel, Ben Solomon, Rebecca C. Spillmann, Joan M. Stoler, Jennifer A. Sullivan, Kathleen Sullivan, Angela Sun, Shirley Sutton, David A. Sweetser, Virginia Sybert, Holly K. Tabor, Amelia L. M. Tan, Queenie K.-G. Tan, Mustafa Tekin, Fred Telischi, Willa Thorson, Cynthia J. Tifft, Camilo Toro, Alyssa A. Tran, Brianna M. Tucker, Tiina K. Ury, Adeline Vanderver, Matt Velinder, Dave Viskochil, Tiphonie P. Vogel, Colleen E. Wahl, Melissa Walker, Stephanie Wallace, Nicole M. Walley, Jennifer Wambach, Jijun Wan, Lee-kai Wang, Michael F. Wangler, Patricia A. Ward, Daniel Wegner, Monika Weisz-Hubshman, Mark Wener, Tara Wenger, Katherine Wesseling Perry, Monte Westerfield, Matthew T. Wheeler, Jordan Whitlock, Lynne A. Wolfe, Kim Worley, Changrui Xiao, Shinya Yamamoto, John Yang, Diane B. Zastrow, Zhe Zhang, Chunli Zhao, Stephan Zuchner

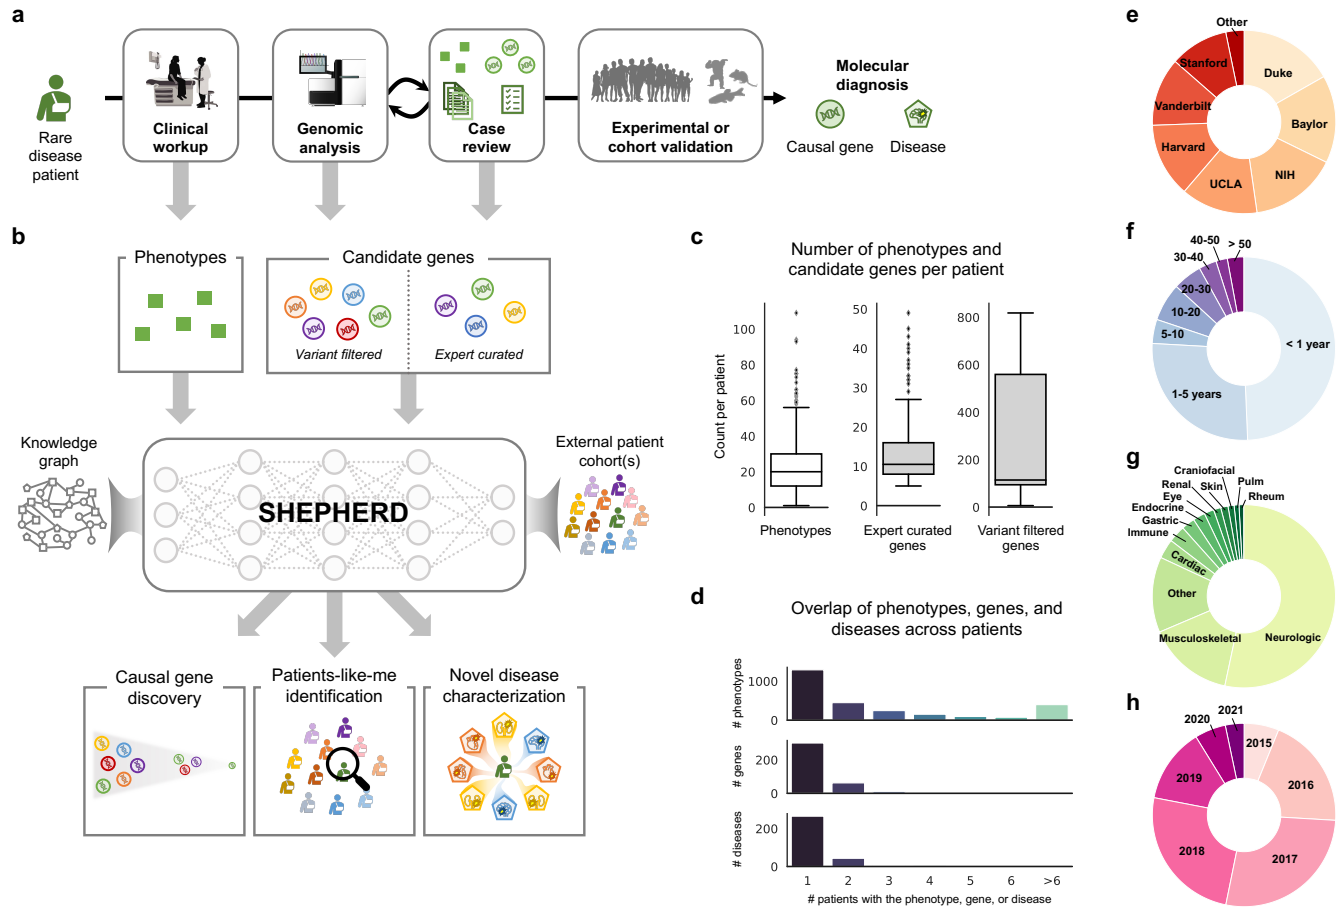

**Figure 1: Overview of SHEPHERD in the rare disease diagnosis pipeline.** (a) After years of failed diagnostic attempts, once a patient is accepted to the UDN, they receive a thorough clinical workup and genetic sequencing, and their case is analyzed in an iterative process to identify the candidate genes likely to explain the patient’s symptoms. SHEPHERD can be used throughout the diagnostic process: after the clinical workup to find similar patients, after the sequencing analysis to identify strong candidate genes, and after the case review to further prioritize candidate genes, characterize the patient’s disease, and/or validate candidate genes by finding phenotype and genotype-matched patients. (b) SHEPHERD takes in as input the patient’s set of phenotype terms and leverages an external rare disease knowledge graph to perform multi-faceted rare disease diagnosis. SHEPHERD can optionally consider a list of candidate genes (either variant-filtered or expert-curated) or external patient cohort(s), depending on the prediction task of interest (e.g., causal gene discovery, patients-like-me identification). For simplicity, the knowledge graph is depicted using three shapes: circles as genes, squares as phenotypes, and pentagons as diseases; refer to Methods for all node types. (c) Number of HPO phenotype terms and candidate genes in each of the two candidate gene lists across patients in our UDN cohort. (d) Overlap of phenotype terms, genes, and diseases across patients. Most phenotype terms, genes, and diseases are found in only a single UDN patient. (e-h) Number of patients in each (e) UDN clinical site, (f) age category, (g) primary presenting symptom, and (h) evaluation year.

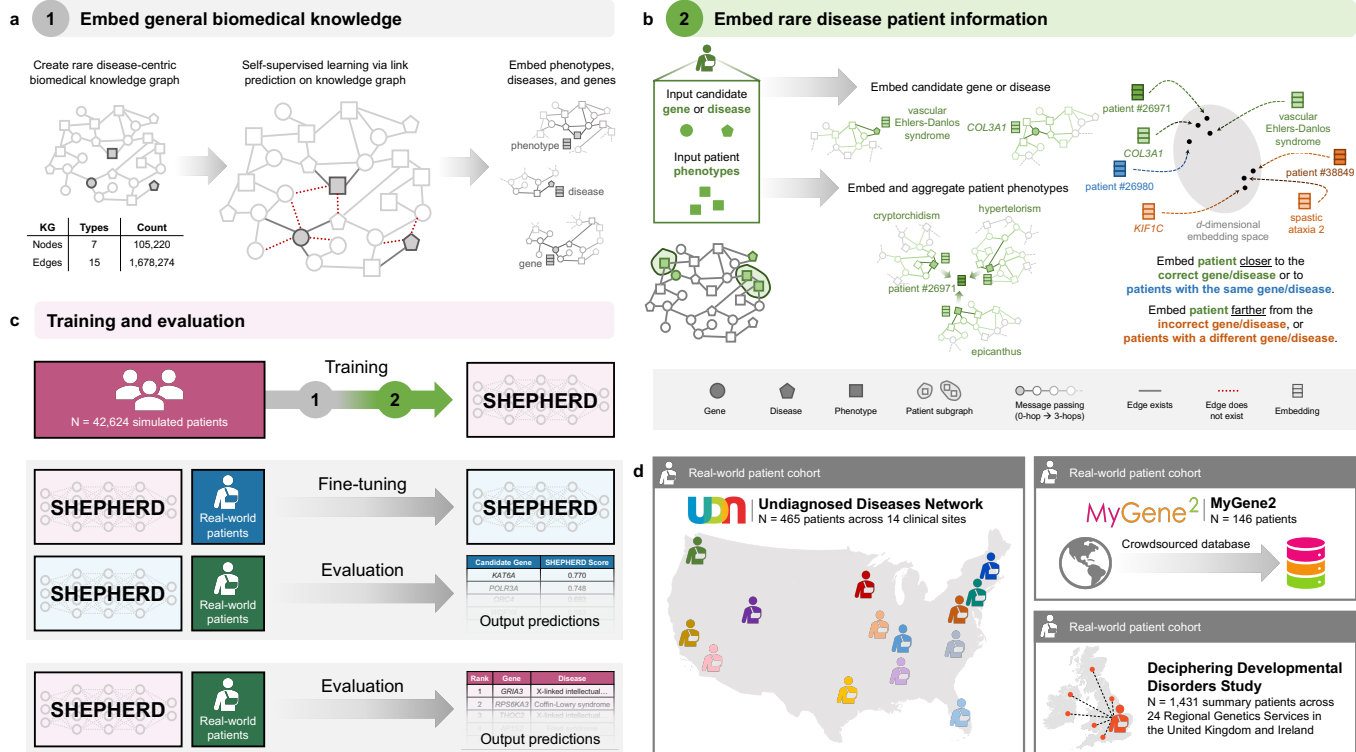

**Figure 2: SHEPHERD architecture, training, and generalizability.** (a-b) SHEPHERD is trained in a two-step process. (a) First, the model is pretrained to embed the biomedical knowledge in the knowledge graph. (b) Then, the pretrained model is applied to the task of rare disease diagnosis. Patient information is overlaid on the knowledge graph, and SHEPHERD generates an embedding for the patient phenotype terms and each candidate gene, disease, or patient. The model is trained via a loss function that encourages patient embeddings to be close to the embeddings of their causal gene or disease or other patients with the same gene or disease. (c) SHEPHERD is trained on a large cohort of simulated patients (pink). It can be further trained on real-world patients (blue) and then evaluated on an independent cohort of real-world patients (green). Alternatively, SHEPHERD can directly be evaluated on real-world patients (green) without any additional training. (d) We leverage real patient data derived from three distinct cohorts: the Undiagnosed Diseases Network (UDN;  $N = 465$ ), MyGene2 ( $N = 146$ ), and Deciphering Developmental Disorders Study (DDD;  $N = 1,431$ ). For simplicity, the KG is depicted using three shapes: circles as genes, squares as phenotypes, and pentagons as diseases; refer to Methods for all node types.

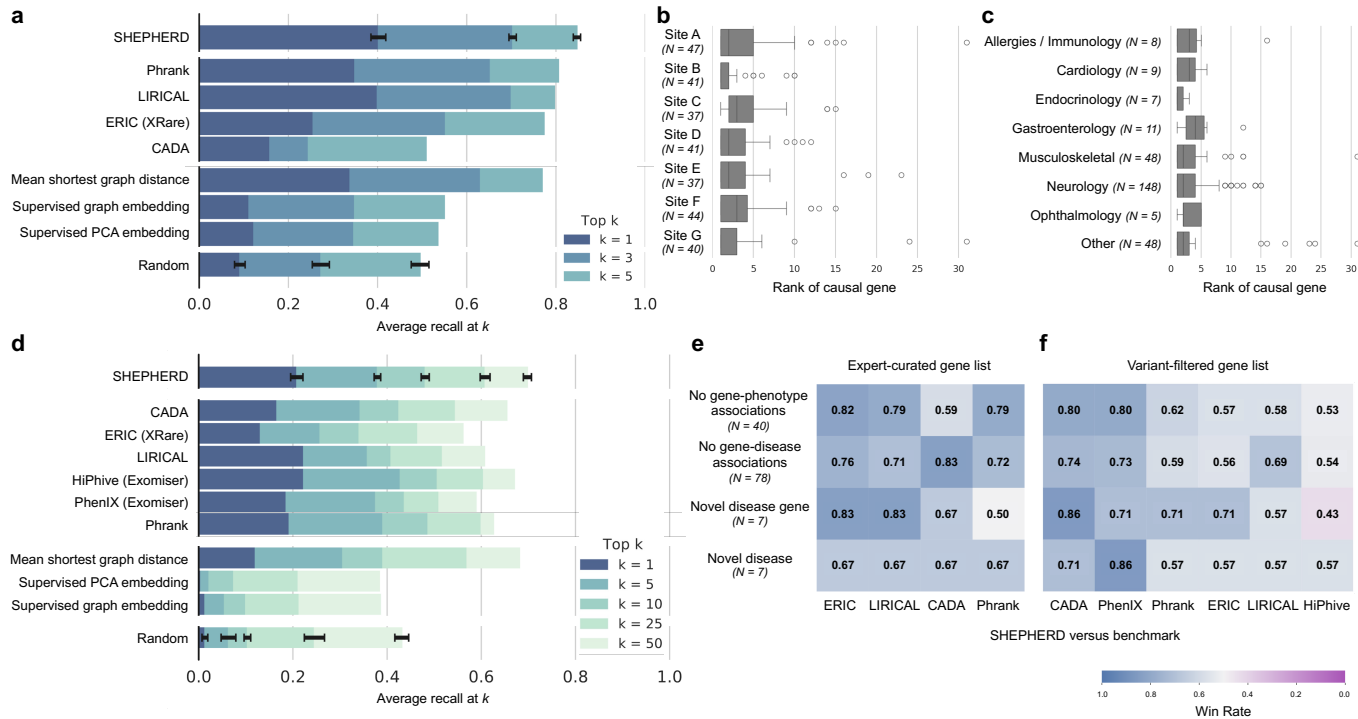

**Figure 3: SHEPHERD performs generalizable causal gene discovery.** (a) Performance of SHEPHERD, four domain-specific approaches, three traditional machine learning / network science baselines, and a random baseline. The performance metric is average recall at  $k$  for  $k = 1, 3,$  and  $5$ . Error bars denote standard deviation over models trained with 5 random seeds. (b-c) Performance of SHEPHERD in ranking causal genes stratified by (b) clinical sites and (c) primary presenting symptoms. Each boxplot shows the median and interquartile range of the rank of the causal gene. Whiskers extend to  $\pm 1.5 \times$  IQR. (d) Performance of SHEPHERD, six domain-specific approaches, three traditional machine learning / network science baselines, and a random baseline. The performance metric is average recall at  $k$  for  $k = 1, 5, 10, 25,$  and  $50$ . Error bars denote standard deviation over models trained with 5 random seeds. (e-f) Performance of SHEPHERD against domain-specific algorithms in four extremely hard-to-diagnose scenarios on (e) EXPERT-CURATED and (f) VARIANT-FILTERED gene lists. Shown is the win rate, the proportion of patients where SHEPHERD performs the same as or better than the benchmark algorithms.

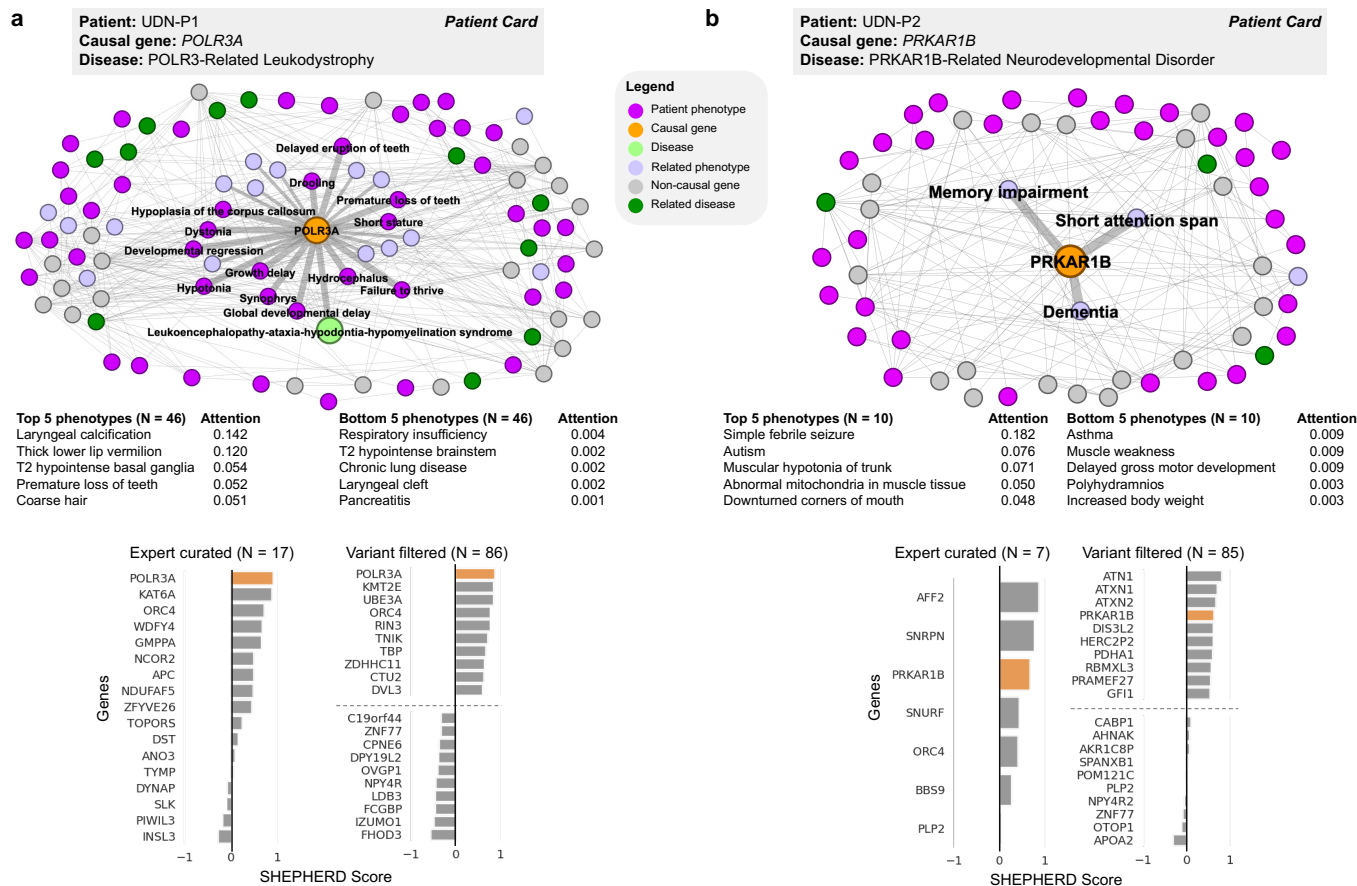

**Figure 4: Causal gene discovery case studies for patients with novel genetic conditions.** SHEPHERD identifies the causal gene even in atypical or novel disease presentations. Each patient case study, shown in (a) and (b), includes the subset of the knowledge graph containing all nodes in the shortest path between the patient’s phenotype terms, causal gene, and disease; a table of the patient’s phenotype terms and attention weights learned by SHEPHERD; and bar plots of scores SHEPHERD assigned to each candidate gene in the EXPERT-CURATED and VARIANT-FILTERED lists. The top and bottom 5 ranked genes in the VARIANT-FILTERED list are shown. The causal gene is highlighted in orange. The direct phenotypic neighbors of the causal gene are emphasized. In patient UDN-P1’s network, the patient’s causal gene is directly connected to the disease in the knowledge graph. In patient UDN-P2’s network, there is no disease node because the patient has a novel uncharacterized syndrome. All panels, except those labeled as a “Patient Card” (colored box with the information provided by the UDN), depict SHEPHERD’s predictions or analyses performed on outputs of SHEPHERD.



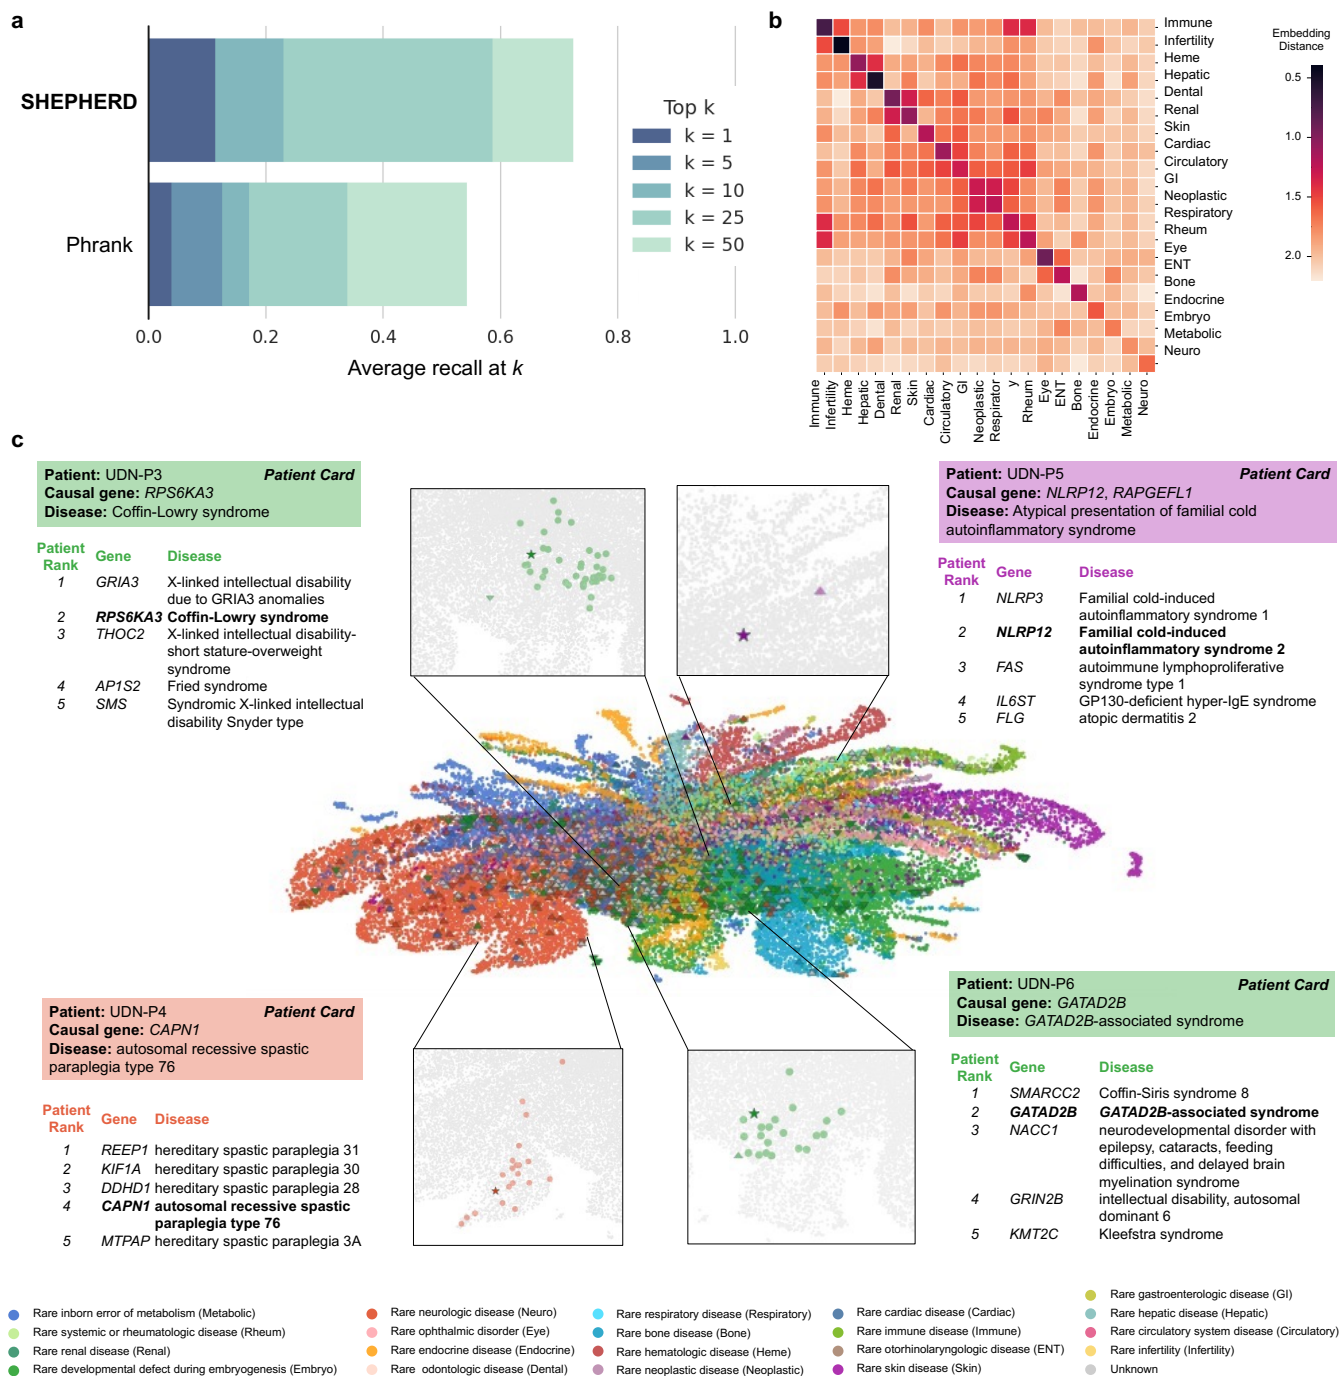

**Figure 5: SHEPHERD identifies patients-like-me from simulated, UDN, and MyGene2 cohorts.** (a) Performance of SHEPHERD in retrieving MyGene2 patients with the same causal gene as a UDN patient ( $n=75$  UDN patients with at least one matching patient in the MyGene2 cohort). SHEPHERD is benchmarked against Phrank, a domain-specific algorithm. The performance metric is average recall at  $k$  for  $k = 1, 5, 10, 25$  and  $50$ . (b) Heatmap of the average distance between the phenotype embeddings of pairs of patients across disease categories. Darker colors indicate smaller distances and lighter colors indicate larger distances between patients of each pair of disease categories. (c) Two-dimensional UMAP plot of SHEPHERD’s embedding space of all simulated (circle), UDN (up-facing triangle), and MyGene2 (down-facing triangle) patients colored by their Orphanet disease category. Each of the four case studies consists of a zoomed-in UMAP displaying the query patient (star) and all patients with the same causal gene as the query (colored circles) and a table containing information regarding the top five most similar patients retrieved by SHEPHERD. Patients are bolded in the table if they share the same causal gene. All panels, except those labeled as a “Patient Card” (colored box with the information provided by the UDN), depict SHEPHERD’s predictions or analyses performed on outputs of SHEPHERD.

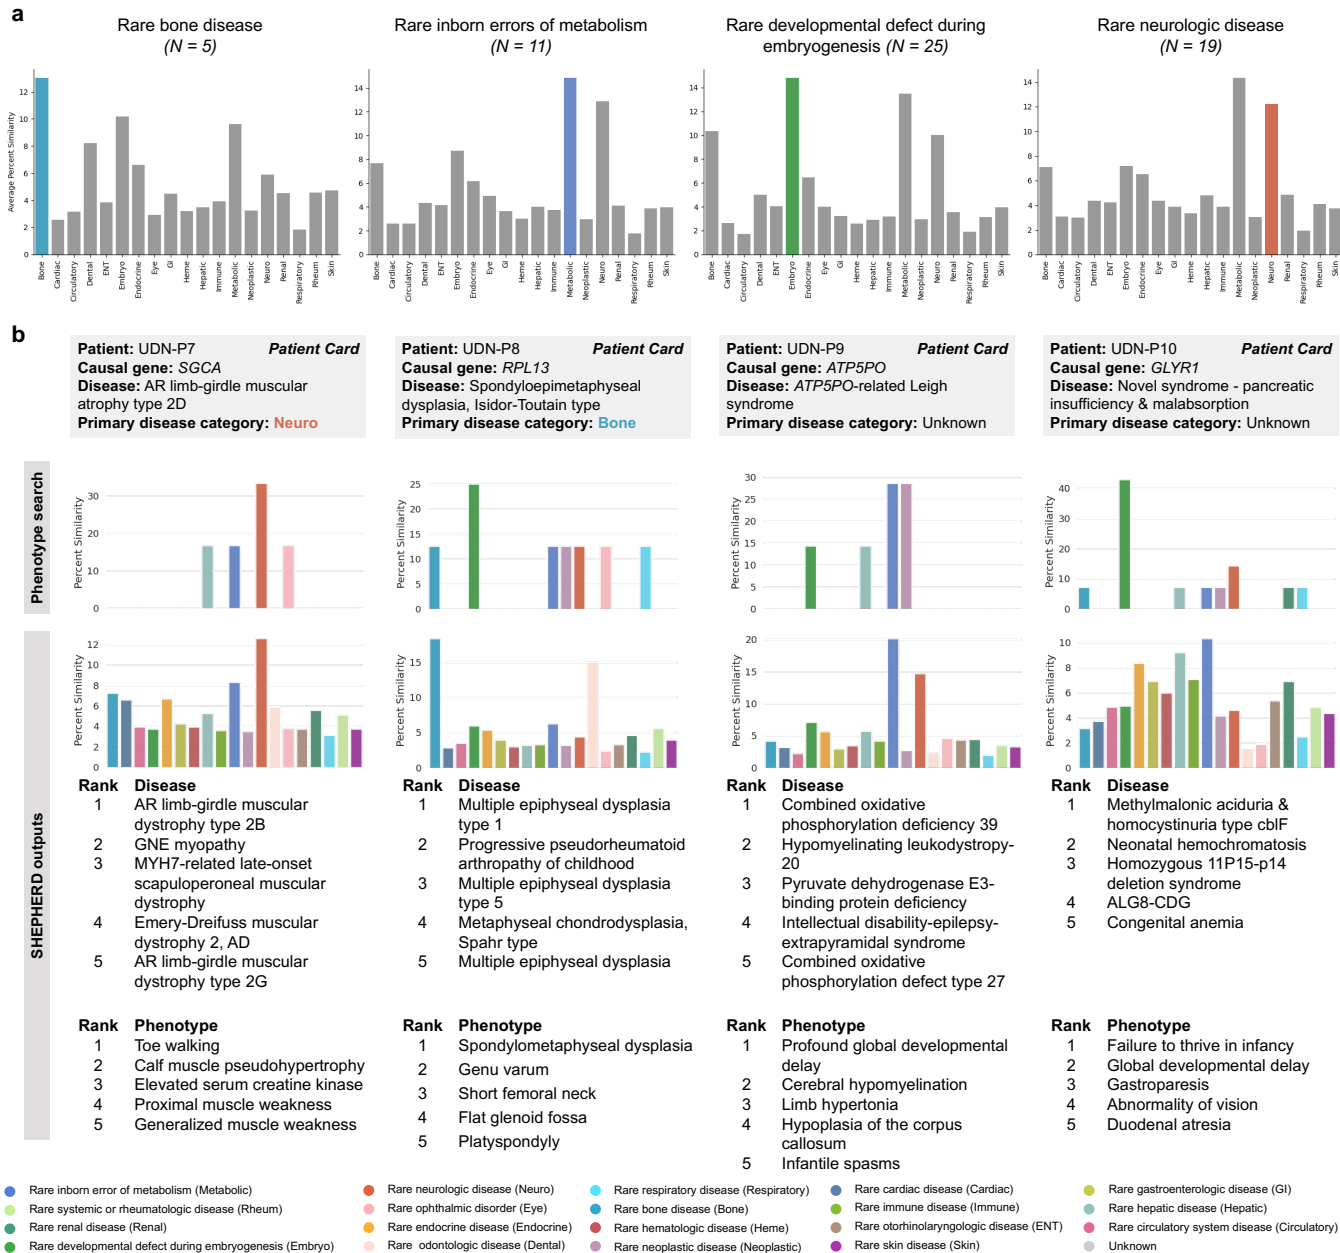

**Figure 6: SHEPHERD performs novel disease characterization.** (a) Bar plots of the similarity between UDN patients and diseases found in each disease category. We group UDN patients by the disease category of their true disease and show plots for all categories with at least 5 patients. The bars that do not correspond to the disease category of each patient's true disease are colored gray. (b) The column for each of the four case studies contains: the percent similarity distributions of the patient's phenotype terms to diseases in each disease category based on a phenotype search via the KG (top) or SHEPHERD (bottom), a table of the five most similar diseases according to SHEPHERD, and a table of the patient's five phenotypic features that are most highly attended by SHEPHERD.

## Online Methods

The Methods section is structured as follows: 1) description of our rare disease knowledge graph, 2) description of our rare disease patient cohorts, 3) summary of our algorithmic approach for rare disease diagnosis, 4) details regarding model training, and 5) descriptions of our statistical analysis and evaluation setup.

### 1 Rare Disease Knowledge Graph Construction

We create a comprehensive knowledge graph (KG) for rare disease diagnosis. We start with PrimeKG [81] and adapt it to the rare disease diagnostic setting by removing drug-specific entities and relations and incorporating additional sources of the gene, phenotype, and disease relationships. The resulting rare disease KG contains seven node types (*i.e.*, phenotype, protein, disease, pathway, molecular function (MF), cellular component (CC), and biological process (BP)) and 15 unique relation types (*i.e.*, phenotype-protein, disease-phenotype<sup>(-)</sup> (indicating that disease does not have phenotype), disease-phenotype<sup>(+)</sup> (indicating that disease has phenotype), protein-pathway, disease-protein, protein-MF, protein-CC, protein-BP, BP-BP, MF-MF, CC-CC, phenotype-phenotype, protein-protein, disease-disease, pathway-pathway).

#### 1.1 Data Sources and Harmonization

Relationships are extracted from the following data sources: Gene Ontology (GO) [83], Reactome pathway knowledgebase [84], DisGeNET [85], NCBI [86], Human Phenotype Ontology (HPO) [87], MONDO disease ontology [88], and Orphanet [89]. PrimeKG contains disease-protein relationships from DisGeNET, and we include additional disease-protein and disease-phenotype relationships from Orphanet if they are not already present in the KG. All phenotype terms are mapped to the Human Phenotype Ontology, all genes/proteins are mapped to Ensembl identifiers, and all diseases are mapped to MONDO identifiers. When a concept is represented in the HPO and MONDO ontologies, we remove the MONDO identifier. This differs from the original PrimeKG preprocessing, where conflicting identifiers are mapped to MONDO IDs. We perform all other preprocessing as in the original PrimeKG knowledge graph. For additional information about each data source and the harmonization process, refer to PrimeKG [81].

## 1.2 Knowledge Graph Pre-processing

We enforce homophily between genes and phenotypes by computing the triadic closure between gene-disease and disease-phenotype edges [90,91]. We extract the largest connected component to ensure the KG is fully connected. The largest connected component retains 99.91% of the nodes and 99.99% of the edges from the knowledge graph. Finally, we add reverse edges to ensure the KG is represented as an undirected graph during model training.

## 1.3 Final Knowledge Graph Statistics

The final knowledge graph contains 105,220 nodes and 1,095,469 edges. Tables 1-2 outline the number of nodes and edges by node type and relation type, respectively.

**Table 1: Statistics about nodes in the rare disease knowledge graph.** Reported is the number of nodes by node type. MF: molecular function, CC: cellular component, BP: biological process.

| NODE TYPE | COUNT  | AVERAGE DEGREE | VOCABULARY                    |
|-----------|--------|----------------|-------------------------------|
| PHENOTYPE | 15,874 | 49.5 ± 190.6   | HUMAN PHENOTYPE ONTOLOGY [87] |
| DISEASE   | 21,233 | 17.1 ± 37.4    | MONDO [88]                    |
| PROTEIN   | 21,610 | 74.2 ± 119.8   | ENSEMBL [92]                  |
| PATHWAY   | 2,516  | 19.0 ± 29.9    | REACTOME [84]                 |
| MF        | 11,169 | 8.7 ± 127.4    | GENE ONTOLOGY [83]            |
| CC        | 4,176  | 22.3 ± 197.2   | GENE ONTOLOGY [83]            |
| BP        | 28,642 | 8.7 ± 28.1     | GENE ONTOLOGY [83]            |

## 2 Rare Disease Patient Cohorts

We use four distinct rare disease patient cohorts for training and evaluating SHEPHERD: UDN (Section 2.1), a real-world cohort of hard-to-diagnose patients in the Undiagnosed Diseases Network, MYGENE2 (Section 2.2), a publicly available real-world cohort of patients with rare genetic conditions who have opted to share their information on the MyGene2 Portal, DDD (Section 2.3), a publicly available aggregated summary of real pediatric patients with severe developmental disorders in the Deciphering Developmental Disorders study, and SIMULATED (Section 2.4), a large diverse and realistic simulated patient cohort representing 2,134 unique rare diseases in Orphanet. The diseases found in each cohort are in Supplemental Table 1.

For every patient cohort, we categorize each patient’s causal disease according to the 33 disease categories outlined in Orphanet. We map all diseases to Orphanet and leverage the Orphanet

**Table 2: Statistics about the edges in the rare disease knowledge graph.** Reported is the number of edges by relation type. HPO: Human Phenotype Ontology.

| RELATION TYPE                    | COUNT   | SOURCES                                                                       |
|----------------------------------|---------|-------------------------------------------------------------------------------|
| PHENOTYPE-PHENOTYPE              | 21,925  | HPO [87]                                                                      |
| PHENOTYPE-PROTEIN                | 10,518  | HPO [87], MONDO [88], ORPHANET [89]                                           |
| DISEASE-DISEASE                  | 35,167  | DISGENET [85], MONDO [88], ORPHANET [89]                                      |
| DISEASE-PHENOTYPE <sup>(-)</sup> | 1,483   | HPO [87], DISGENET [85], MONDO [88], ORPHANET [89]                            |
| DISEASE-PHENOTYPE <sup>(+)</sup> | 204,779 | HPO [87], DISGENET [85], MONDO [88], ORPHANET [89]                            |
| DISEASE-PROTEIN                  | 86,299  | DISGENET [85], MONDO [88], ORPHANET [89]                                      |
| PROTEIN-PROTEIN                  | 321,075 | MENCHE <i>et al.</i> [93], BIOGRID [94], STRING [95], LUCK <i>et al.</i> [69] |
| PROTEIN-PATHWAY                  | 42,646  | REACTOME [84]                                                                 |
| PATHWAY-PATHWAY                  | 2,535   | REACTOME [84]                                                                 |
| PROTEIN-MF                       | 69,530  | GENE ONTOLOGY [83]                                                            |
| PROTEIN-CC                       | 83,402  | GENE ONTOLOGY [83]                                                            |
| PROTEIN-BP                       | 144,805 | GENE ONTOLOGY [83]                                                            |
| MF-MF                            | 13,574  | GENE ONTOLOGY [83]                                                            |
| CC-CC                            | 4,845   | GENE ONTOLOGY [83]                                                            |
| BP-BP                            | 52,886  | GENE ONTOLOGY [83]                                                            |

linearisation process ([http://www.orphadata.org/cgi-bin/rare\\_free.html](http://www.orphadata.org/cgi-bin/rare_free.html)) to assign each disease to a single disease category based on a series of rules that consider the most severely affected body system and the specialists most likely to be involved in treatment.

## 2.1 Patients in the Undiagnosed Diseases Network

**Undiagnosed Diseases Network.** The Undiagnosed Diseases Network (UDN) is a nationwide research study supported by the National Institutes of Health Common Fund, which aims to bring together clinical and research experts around the United States to diagnose patients with rare genetic conditions [96]. The UDN consists of 12 clinical sites across the United States that evaluate patients, a sequencing core, a model organism screening center, a central biorepository, a metabolomics core, and a coordinating center. Patients are admitted to the UDN if they have objective findings, and clinical testing has failed to produce a diagnosis. Most admitted patients receive exome or whole genome sequencing and an extensive clinical workup. The Undiagnosed Diseases Network study is approved by the National Institutes of Health institutional review board (IRB), which serves as the central IRB for the study (Protocol 15HG0130). All patients accepted to the UDN provide written informed consent to share their data across the UDN as part of a

network-wide informed consent process.

**Constructing patient subgraphs.** Deep phenotyping of patients during the clinical workup is a central component of the UDN process. Clinicians annotate each patient with a set of terms from the Human Phenotype Ontology (HPO) using PhenoTips, a tool integrated into the electronic health record that allows for structured phenotyping of patient symptoms [97]. We discard 406 unique prenatal phenotype terms related to the mother's pregnancy and use all remaining phenotype terms to construct patient subgraphs. Each patient subgraph is formed from the phenotype nodes in the rare disease knowledge graph that describe the patient's symptoms (Methods 3). We construct phenotype subgraphs for the 465 UDN patients with annotated phenotype terms who have received a molecular diagnosis as of January 5, 2022.

**Obtaining EXPERT-CURATED candidate gene lists.** Genomic samples for each patient are sequenced at Baylor Genetics or Hudson Alpha. We construct an EXPERT-CURATED candidate gene list for each patient from the patient's sequencing data. Importantly, these gene lists are unique to each patient. The EXPERT-CURATED candidate gene list for each patient includes the union of both (1) disease-associated and other clinically-relevant genes listed on the patient's clinical sequencing reports from Baylor or Hudson Alpha per the UDN protocol and American College of Medical Genetics and Genomics (ACMG) guidelines [29, 98, 99] and (2) genes that were prioritized by UDN clinical teams who handled the patient's case. The genes in this list represent the strongest candidates identified by the UDN sequencing core or the clinical team. In addition, the list often includes known disease-causing genes, genes with suspected pathogenic variants, or genes expressed in tissues relevant to the patient's clinical presentation. While the EXPERT-CURATED gene list contains the strongest candidates, the list nevertheless requires further filtering to identify the ultimate causal gene(s) that explain the patient's condition. We exclude patients whose candidate gene lists have fewer than five candidate genes for the causal gene discovery task. The cohort contains 278 patients with at least five EXPERT-CURATED candidate genes.

**Obtaining VARIANT-FILTERED candidate gene lists.** As part of the UDN analysis pipeline, the UDN performs the whole genome and exome sequencing for a patient and their immediate family members. Here, we use the patients' whole genome sequencing (WGS) data, which are aligned to the GRCh38.p13/hg38 human genome build and have undergone variant calling via the Genome Analysis Toolkit (GATK) best practices workflow [47]. Please refer to [47] for more details about



the computational workflow across UDN sites. Access to the UDN patients' WGS data allows us to construct for each patient a VARIANT-FILTERED candidate gene list consisting of genes that have at least one variant and that have been prioritized by a variant-level prioritization algorithm. We leverage the Exomiser algorithm, which considers variant frequency, predicted pathogenicity, and (if family members' sequencing data are available) mode of inheritance [100]. While Exomiser can leverage known associations between genes and phenotypic features, we do not use it to construct our VARIANT-FILTERED candidate gene lists.

We analyze the patients' variant-called WGS data (*i.e.* variant call format, or VCF) using Exomiser under the following inheritance modes: autosomal dominant, autosomal recessive homozygous alternate, autosomal recessive compound heterozygous, X dominant, X recessive homozygous alternative, X recessive compound heterozygous, and mitochondrial. Their respective cutoff values (*i.e.* the maximum minor allele frequency in percent (%) permitted for an allele to be considered a causative candidate under that mode of inheritance) are 0.1, 0.1, 2.0, 0.1, 0.1, 2.0, and 0.2. We remove variants with non-coding effects (*i.e.* 5' and 3' UTR exon/intron variants, non-coding transcript exon/intron variants, coding transcript intron variants, up-/down-stream gene variants, intergenic variants, and regulatory region variants). We use the following pathogenicity sources, POLYPHEN, MUTATION\_TASTER, and SIFT. We apply a frequency filter to remove variants with a frequency of at least 0.5% according to the variant frequency databases used. All variant frequency databases are used, as recommended by the Exomiser manual. We retain non-pathogenic variants in the output gene list. As with the EXPERT-CURATED gene lists, we filter out patients who do not have at least five candidate genes in their VARIANT-FILTERED gene list. The cohort includes 229 patients with at least five VARIANT-FILTERED candidate genes.

**Preprocessing disease labels.** Diagnosed patients in the UDN are labeled with a disease identifier from the Online Mendelian Inheritance in Man (OMIM) database [101] when the patient is diagnosed with a known genetic disease. We map the OMIM disease identifiers to MONDO identifiers [88] using the MONDO ontology crosswalk to identify the diseases in the rare disease knowledge graph (Section 1).

**Dataset statistics.** The final UDN cohort contains 465 patients representing 319 MONDO diseases and 378 unique causal genes. The EXPERT-CURATED and VARIANT-FILTERED candidate gene lists contain 244.3 and 13.3 genes on average, respectively (SD = 244.0 and SD = 8.0). Patients have

23.9 HPO phenotype terms on average (SD = 16.1).

## 2.2 Patients in the MyGene2 Portal

We assemble another cohort of real-world rare disease patients participating in the MyGene2 exchange [50]. MyGene2, developed by the University of Washington, is a portal through which families with rare genetic conditions can share their health information to connect with other families, clinicians, and researchers. MyGene2 contains information about 2,106 genes and the HPO phenotype terms of patients with gene mutations. MyGene2 is a member of the MatchMaker Exchange, a federated network designed to enable clinicians to find phenotype and genotype matches for rare disease patients [102]. The UDN leverages the MatchMaker exchange to validate patients' candidate genes by finding genotype-matched individuals.

**Dataset preprocessing and patient subgraph construction.** We retrieved data containing the sets of phenotype terms and candidate genes for rare disease patients on MyGene2 as of May 7, 2022. We filter the patients only to include patients labeled with an OMIM disease identifier. This limits the cohort to patients who are likely already diagnosed. As with the other cohorts, we map all genes to Ensembl identifiers, diseases to MONDO identifiers, and construct patient subgraphs from the set of positive HPO terms associated with each patient.

**Dataset statistics.** The final MyGene2 cohort contains 146 patients representing 55 MONDO diseases and 48 unique causal genes. Patients have 7.9 HPO phenotype terms on average (SD = 6.6). There are 14 unique causal genes and 12 diseases in the MyGene2 and UDN cohorts.

## 2.3 Patients derived from the Deciphering Developmental Disorders Study

We construct another dataset of rare disease patients using aggregated gene and phenotypic information from patients in the Deciphering Developmental Disorders Study. This initiative recruited nearly 14,000 children with severe undiagnosed developmental disorders from the United Kingdom and Ireland [51].

**Dataset preprocessing and patient subgraph construction.** We retrieved data containing the sets of phenotype terms and associated genes from DECIPHER (<https://www.deciphergenomics.org/ddd/ddgenes>) on May 10, 2023. We remove genes where the evidence supporting a causal role for the gene is either limited or moderate, and we use the remaining genes and associated

phenotype term sets to construct the patient cohort. We map all genes to Ensembl identifiers, diseases to MONDO identifiers, and build patient subgraphs from the set of HPO terms associated with each patient. Non-causal candidate genes for each patient are constructed by sampling genes in the knowledge graph neighboring the patient's phenotype terms or causal gene.

**Dataset statistics.** The final DDD-derived cohort contains 1,431 patients, representing 1,237 MONDO diseases and 1,282 unique causal genes. Patients have 20.5 HPO phenotype terms on average (SD = 19.2). There are 158 unique causal genes and 93 diseases found in the DDD and UDN cohorts.

## 2.4 Simulated Patients with Rare Mendelian Disorders

We leverage simulated but realistic rare disease patients for training SHEPHERD [45]. The simulated patients closely resemble real-world patients found in the UDN. Each simulated patient is represented by an age range, a set of positive phenotypic features they exhibit, a set of negative phenotypic features they do not exhibit, and a set of challenging candidate genes that may cause the presenting symptoms. The patients are generated using a simulation framework that jointly samples candidate genes and phenotype terms.

**Generating realistic simulated rare disease patients.** To generate patients with rare Mendelian disorders, we adopt the pipeline described in [45]. Briefly, the simulation pipeline has two stages: phenotype and candidate gene generation. First, each patient is initialized with a set of phenotype terms associated with a genetic disorder characterized in the rare genetic disease database Orphanet [89]. To reflect the imprecision of real-world diagnostic evaluations, the initial phenotype terms undergo phenotype dropout and corruption (*i.e.*, phenotype terms are randomly removed or replaced with more general phenotype terms), and additional “noisy” phenotype terms that are unrelated to the patient's disease are sampled from a large medical insurance claims database and added to the phenotype set. Next, candidate genes are sampled from “distractor” gene categories that do not cause the patient's disease yet would be plausible candidates during the diagnostic process. The challenging distractor genes and some of their associated phenotype terms are added. For additional details about the simulation process and validation of simulated patients, refer to [45]. To standardize across all patient cohorts, we ensure all genes are mapped to Ensembl identifiers, all diseases are mapped to MONDO identifiers, and we construct patient subgraphs from the phenotype terms associated with each patient.

**Dataset statistics.** There are 42,624 simulated patients representing 2,132 unique Mendelian disorders and 2,396 unique causal genes in the simulated patient dataset. Each patient is characterized by an average of 18.4 positive phenotype terms ( $SD = 7.7$ ) and 14.0 candidate genes ( $SD = 3.5$ ). Of the 378 unique causal genes and 319 unique MONDO diseases found in patients in the UDN cohort, 220 and 109 are represented in the simulated patient cohort, respectively. Furthermore, 81.8% of the phenotype terms found across UDN patients are also found in the simulated patient cohort, and 29.7% of a single UDN patient’s phenotype terms are found in the most similar simulated patient on average. This indicates that the simulated patients have utility in training models that can apply to real-world UDN patients but also emphasizes the need for developing models that can generalize to genes, diseases, and phenotype terms unseen at train time.

### 3 Few shot Learning Framework for Rare Disease Diagnosis

We develop SHEPHERD, a geometric deep learning approach that leverages few shot capability and external biomedical knowledge for multi-faceted diagnosis of rare diseases. SHEPHERD learns to co-embed diseases, phenotypes, and genes for generating multi-modal representations of rare disease patients. As such, it performs multi-faceted diagnosis, addressing the following challenges of rare disease diagnosis:

- **Causal Gene Discovery:** Each patient  $T_i$  in the dataset has  $P_i$  phenotype terms and  $G_i$  candidate genes. The task is to identify the causal gene(s)  $G_i^c \in G_i$ , harboring the variants that explain the patient’s presenting symptoms.
- **Identification of Similar Patients:** Given a cohort of rare disease patients  $C$ , the goal is to identify patients from the cohort similar to the query patient  $T_i$  (*i.e.*, patients that share a disease or causal gene). Mathematically, for each patient  $T_i$ , the task is to identify the set of patients  $S_i^c = \{T_j \in C | G_i^c \cap G_j^c \neq \emptyset\}$ . We leverage each patient’s set of phenotype terms  $P_i$  to perform patient matching.
- **Characterization of Novel Diseases:** The goal is to characterize novel diseases according to their similarity to a set of known genetic diseases  $D$ . We input the set of phenotype terms  $P_i$  for each patient  $T_i$  and provide interpretable names for the patient’s presenting syndrome.

**Notation.** Let  $\mathcal{G}$  denote a heterogeneous knowledge graph comprised of a set of nodes  $V$  and a set of edges  $E$ . Each edge is defined by a triplet  $(u, r, v)$  where  $u$  is the source node,  $v$  is the

target node and  $r \in R$  denotes the relationship between  $u$  and  $v$ . Each patient  $i$  is represented on the graph as a patient subgraph induced by a set of phenotype nodes  $P_i$  where  $P_i \subseteq V$ . The patient subgraph can contain any number of phenotype terms and multiple connected components throughout  $\mathcal{G}$ . Each patient may also have a set of candidate genes  $G_i \subseteq V$ .

### 3.1 Encoding Biomedical Knowledge

The first step in SHEPHERD is to encode biomedical relationships in the rare disease knowledge graph (KG). We pretrain SHEPHERD on millions of biomedical entity pairs across all entity and relation types in the KG to capture the topology of the KG. To this end, we use a graph attention network (GAT) [103], a type of graph neural network (GNN) model to generate embeddings  $\mathbf{x}_v$  for every node  $v$  in the KG. Specifically, the choice of a graph attention network is necessary to achieve semantically-relevant mixing of biomedical entities in the embedding space; that is, to encourage distinct node types (*e.g.* genes, diseases, and phenotypes) to be positioned near each other in the embedding space. Like most GNNs, GAT models can be formulated as message-passing networks, in which messages are propagated to a node  $v$  from all of the nodes in its neighborhood  $\mathcal{N}_v$ . The messages are aggregated and combined with the previous layer's representation of  $v$  to produce  $v$ 's representation for the current layer. Concretely, each layer  $l$  in SHEPHERD's GNN encoder involves the following steps:

**Step 1: Propagate neural messages:** We define the message  $\mathbf{m}_{v,k}^{(l)}$  for each node  $v$  as:

$$\mathbf{m}_{v,k}^{(l)} = \mathbf{W}_k^{(l)} \mathbf{h}_v^{(l-1)} \quad (1)$$

where  $k$  represents the attention head,  $\mathbf{W}$  is a relation-specific trainable weight matrix, and  $\mathbf{h}_v$  is the embedding of node  $v$  in the  $(l-1)$ -th hidden layer.

**Step 2: Aggregate messages from local neighborhoods:** We leverage the local neighborhood to generate a representation of each node  $v$ . Specifically, we aggregate messages of its neighboring nodes  $u \in \mathcal{N}_v$  using an attention mechanism to generate  $\mathbf{a}_{v,k}^{(l)}$ :

$$\mathbf{a}_{v,k}^{(l)} = \sum_{u \in \mathcal{N}_v} \alpha_{v,u,k}^{(l)} \cdot \mathbf{m}_{u,k}^{(l)} \quad (2)$$

where  $\alpha_{v,u,k}$  is the normalized attention weight on an edge from node  $v$  to node  $u$  computed by the  $k$ -th attention mechanism.

**Step 3: Update node embeddings:** To transform the messages into an order-invariant hidden representation  $\mathbf{h}_v^{(l)}$ , we apply a nonlinearity function  $\sigma$  and concatenate all of the aggregated messages as follows:

$$\mathbf{h}_v^{(l)} = \parallel_{k=1}^K \sigma(\mathbf{a}_{v,k}^{(l)}) \quad (3)$$

In the final layer, we perform averaging instead of concatenation. We define the final embedding for each node  $v$  after  $L$  layers of neural message passing as  $\mathbf{x}_v = \mathbf{h}_v^{(L)}$ .

**Objective function.** We frame pretraining as a binary classification task. SHEPHERD learns to perform link prediction (*i.e.* predict whether a relationship exists between a pair of nodes for a given relation type). Formally, we compute the likelihood of an edge existing between node  $u$  and node  $v$  with relation  $r$  given their node embeddings  $\mathbf{x}_u$  and  $\mathbf{x}_v$  using a DistMult decoder [104]:

$$\text{LPSIM}(u, r, v) = \text{ACT}(\mathbf{x}_u^T \mathbf{W}_r \mathbf{x}_v) \quad (4)$$

where  $\mathbf{W}_r$  is a relation-specific trainable weight matrix and ACT is a nonlinear function (here, tanh). SHEPHERD is pretrained via a hinge loss objective. For any pair of nodes  $u$  and  $v$  connected by relation  $r$ , the loss function is defined as:

$$L_{\text{LP}} = \frac{1}{|E|} \sum_{(u,r,v) \in E} \max(0, \Delta - \text{LPSIM}(u, r, v) + \text{LPSIM}(u, r, v^-)), \quad (5)$$

where  $u$  and  $v$  are source and target nodes,  $v^-$  is a target node representing a negative example that is not linked to  $u$  in the KG, LPSIM returns the score indicative of the knowledge relationship existing between  $u$  and  $v$ , and  $\Delta$  is a margin, which is set to 1 throughout all experiments in this study. For each triplet,  $(u, r, v)$  in the KG, its contribution to the value of the loss function is 0 if the difference between the LPSIM's score for the triplet and the LPSIM's score for a negative example is at least as large as the margin.

## 3.2 Generating Rare Disease Patient Representations

We apply the pretrained SHEPHERD model to our multi-faceted rare disease diagnosis tasks. Starting with the pretrained GNN model, we learn patient embeddings that encode each patient's phenotype subgraph. Depending on the diagnostic task, we also learn embeddings for each patient's candidate genes, diseases, or other patients. Concretely, for every patient  $T_i$ , we generate an ag-



gregated representation of all phenotype terms  $p \in P_i$  in the phenotype subgraph via a transformer encoder and an attention-weighted average of the individual phenotype embeddings:

$$\mathbf{x}_{P_i} = \sum_{p \in P_i} \alpha \cdot \mathbf{x}_p, \quad \text{where} \quad \alpha = \frac{\exp(\mathbf{x}_p \cdot \mathbf{a})}{\sum_{p \in P_i} \exp(\mathbf{x}_p \cdot \mathbf{a})} \quad (6)$$

where  $\alpha$  denotes the attention weights,  $\mathbf{x}_p$  denotes the embedding for phenotype term  $p$ , and  $\mathbf{a}$  is a trainable vector initialized via Xavier [105]. The aggregated phenotype representation  $\mathbf{x}_{P_i}$ , each candidate gene node embedding  $\mathbf{x}_g$ , and each candidate disease node embedding  $\mathbf{x}_d$  are pushed through two nonlinear layers to produce the embeddings  $\mathbf{z}_{P_i}$ ,  $\mathbf{z}_g$ , and  $\mathbf{z}_d$ , respectively, as:

$$\mathbf{z}_{P_i} = f(f(\mathbf{x}_{P_i} \cdot \mathbf{W}_1 + \mathbf{b}_1)\mathbf{W}_2 + \mathbf{b}_2) \quad (7)$$

$$\mathbf{z}_g = f(f(\mathbf{x}_g \cdot \mathbf{W}_1 + \mathbf{b}_1)\mathbf{W}_2 + \mathbf{b}_2) \quad (8)$$

$$\mathbf{z}_d = f(f(\mathbf{x}_d \cdot \mathbf{W}_1 + \mathbf{b}_1)\mathbf{W}_2 + \mathbf{b}_2) \quad (9)$$

where  $f$  is a nonlinear function (here, leaky ReLU), and  $\mathbf{W}_1$ ,  $\mathbf{W}_2$ ,  $\mathbf{b}_1$ , and  $\mathbf{b}_2$  are trainable weights. The embeddings,  $\mathbf{z}_{P_i}$ ,  $\mathbf{z}_g$ , and  $\mathbf{z}_d$ , are each  $d$ -dimensional, where the output dimension  $d$  is determined via hyperparameter search (Section 4.4).

Finally, each candidate gene's embedding  $\mathbf{z}_g$  may be augmented with the embeddings of the  $K$  most similar genes. First, an aggregated embedding  $\hat{\mathbf{z}}_g$  of the  $K$  genes with the highest number of shared phenotype terms as gene  $g$  is generated:

$$\hat{\mathbf{z}}_g = \sum_{h=1}^K \frac{\text{sim}(g, h)}{\sum_{i=1}^K \text{sim}(g, i)} * \mathbf{z}_h \quad \text{where} \quad \text{sim}(g, h) = |P_g \cap P_h|. \quad (10)$$

The original gene embedding is then updated via a gating mechanism as follows:

$$\mathbf{z}_g = (1 - \theta_g) \cdot \mathbf{z}_g + \theta_g \cdot \hat{\mathbf{z}}_g, \quad (11)$$

where  $\theta_g$  controls the contribution of the original gene embedding for gene  $g$ . We set  $\theta_g = \omega * \exp(-\omega * |\mathcal{N}_g|) + 0.2$  where  $\omega$  is a hyperparameter for the contribution of the augmented gene embedding, and  $|\mathcal{N}_g|$  is the node degree for gene  $g$  to preferentially update the embeddings for genes with lower degree (*i.e.*, genes that are not as well-characterized) [106].

This approach is motivated by the observation that novel diseases or disease genes can have limited prior research or understanding, resulting in scarce neighbors in the knowledge graph. Due to this sparsity, the nodes' embeddings are of lower quality. For example, in an extreme case, a gene node without any connections to the rest of the knowledge graph would have a randomly initialized embedding. As such, we leverage information about shared phenotypic neighbors to augment these low-information gene nodes.

### 3.3 Discovering Causal Genes

SHEPHERD can prioritize candidate genes to assist clinicians in finding the causal gene(s) harboring the variants that best explain a patient's presenting symptoms. Candidate genes for each patient are scored by measuring the similarity  $\text{SIM}(P, g)$  between a candidate gene  $g$  and a patient's set of phenotype terms  $P$ . SHEPHERD is optimized such that the candidate gene embedded near the patient's set of phenotype terms in the embedding space indicates that the gene will likely cause the patient's symptoms.  $\text{SIM}(P, g)$  consists of two components,  $\text{EMBSIM}(P, g)$  and  $\text{SPLSIM}(P, g)$ . It is designed such that  $\text{EMBSIM}(P, g)$  captures global network topology (*i.e.*, by leveraging SHEPHERD's low-dimensional embedding space) and  $\text{SPLSIM}(P, g)$  captures local network information (*i.e.*, by calculating shortest path length distances). This approach is grounded in the observation that, while methods that learn global network topology yield higher overall performance than local methods considering only local network information, the latter tends to rank true candidate genes higher when provided a short list of candidate genes [107].

**Embedding-based similarity.** We calculate  $\text{EMBSIM}$ , an embedding-based similarity between aggregated embeddings of phenotype terms  $P$  and an embedding of the candidate gene  $g$  as follows:

$$\text{EMBSIM}(P, g) = \text{ACT}(\mathbf{z}_P^T \mathbf{W} \mathbf{z}_g) \quad (12)$$

where  $\text{ACT}$  is a nonlinear function (here,  $\tanh$ ).  $\text{EMBSIM}$  values range between  $[-1, 1]$ .

**Network-based similarity.** We calculate the shortest path length (SPL) similarity between aggregated phenotype terms  $P$  and candidate gene  $g$  as follows:

$$\text{SPLSIM}(P, g) = \text{NORM}(\text{AGG}_{p \in P}(-d(p, g))), \quad (13)$$

where  $P$  is the patient's phenotype terms and  $g$  is a candidate gene,  $\text{AGG}$  is some aggregation

function (e.g. mean),  $\text{NORM}(\mathbf{x}) = \frac{2(\mathbf{x} - \max(\mathbf{x}))}{\max(\mathbf{x}) - \min(\mathbf{x})} - 1$  is a normalization function to scale the values in the range  $[-1, 1]$ , and  $d(p, g)$  is the minimum number of hops between  $p$  and  $g$  in the KG.

**Overall similarity.** The final score between a patient’s phenotype terms  $P$  and candidate gene  $g$  is defined as:

$$\text{SIM}(P, g) = \eta \cdot \text{EMBSIM}(P, g) + (1 - \eta) \cdot \text{SPLSIM}(P, g) \quad (14)$$

where  $\eta$  is a hyperparameter ranging from  $[0, 1]$  that represents the amount of weight to place on EMBSIM versus SPLSIM in the final gene prioritization scoring. SIM values range between  $[-1, 1]$ .

**Objective function.** We leverage a multi-similarity loss to encourage patient phenotype embeddings to be near their causal gene embedding and far away from the incorrect candidate gene embeddings. The multi-similarity loss is defined as follows [108]:

$$L_G = \frac{1}{N} \sum_{i=1}^N \left( \frac{1}{\alpha} \log(1 + \sum_{g \in G_i^c} \exp(-\alpha(\text{SIM}(P_i, g) - \gamma))) + \frac{1}{\beta} \log(1 + \sum_{g \in G_i^d} \exp(\beta(\text{SIM}(P_i, g) - \gamma))) \right),$$

where  $N$  is the number of patients,  $\alpha$ ,  $\beta$ , and  $\gamma$  are hyperparameters, and  $\text{SIM}(P_i, g)$  denotes the similarity between the aggregated phenotype embedding for patient  $i$  and the gene embedding of either the patient’s causal gene ( $g \in G^c$ ) or distractor gene ( $g \in G^d$ ) (Section 3.3). The optimized embedding space encodes patient information such that similarity between a patient’s phenotype terms and candidate genes (i.e., how likely it is that a given gene explains the patient’s symptoms) is inversely proportional to the distance between the patient embedding and the embedding of the candidate gene.

### 3.4 Finding Similar Patients

SHEPHERD can find similar patients from a cohort of rare disease patients. This is important for identifying molecular diagnoses and validating already prioritized candidate genes. To match rare disease patients, SHEPHERD first learns a task-specific similarity function that captures the similarity between two patients. This training process produces an embedding space in which the similarity between two patients is inversely proportional to the distance between the two patient embeddings. The embedding space can be used at inference time to answer “patients-like-me” queries. We define the similarity between two patients  $i$  and  $j$  as the L2 distance between their

aggregated phenotype embeddings  $\mathbf{z}_{P_i}$  and  $\mathbf{z}_{P_j}$ :

$$\text{SIM}(P_i, P_j) = -\|\mathbf{z}_{P_i} - \mathbf{z}_{P_j}\|_2^2. \quad (15)$$

Importantly, when calculating patient similarity, we do not include any genotype information for the patients. This makes the model applicable in settings where the patient's genome has not been sequenced or when the analysis results are still pending.

**Objective function.** SHEPHERD is trained to capture patient similarity using the neighborhood component analysis loss:

$$L_{\text{PH}} = \frac{-1}{|B_p|} \sum_{P_i \in B_p} \log \left( \frac{\sum_{P_j \in B_p \setminus P_i; P_j \in S_i^c} \exp(\text{SIM}(P_i, P_j))}{\sum_{P_j \in B_p \setminus P_i} \exp(\text{SIM}(P_i, P_j))} \right), \quad (16)$$

where  $B_p$  is a batch of patients sampled from the training set and  $S_i^c$  is the set of patients with the same causal gene as patient  $P_i$ . Optimizing the NCA loss [109] minimizes the distances between patient embeddings with the same causal gene and maximizes the distances between patient embeddings with different causal genes.

### 3.5 Estimating Patient-Disease Similarity

Finally, SHEPHERD can characterize a clinical presentation based on existing knowledge about other rare and common diseases. We analogously perform novel disease characterization by learning an embedding space such that the similarity between a patient and a disease (*i.e.* how likely it is that a patient has that disease) is inversely proportional to the distance between the patient embedding and the disease embedding. We define the similarity between a patient's phenotype terms  $P$  and disease  $d$  as the L2 distance between the aggregated phenotype embedding and the disease embedding:

$$\text{SIM}(P, d) = -\|\mathbf{z}_d - \mathbf{z}_P\|_2^2 \quad (17)$$

**Objective function.** To optimize patient phenotype embeddings to be near their correct disease(s),

we leverage a multi-modal version of the NCA loss, defined as:

$$L_D = \frac{-1}{|B_p|} \sum_{P_i \in B_p} \log \left( \frac{\sum_{d_j \in B_d; d_j \in D_i^c} \exp(\text{SIM}(P_i, d_j))}{\sum_{d_j \in B_d} \exp(\text{SIM}(P_i, d_j))} \right) \quad (18)$$

where  $B_p$  and  $B_d$  are batches of patients and candidate diseases, respectively, that are sampled from the training set,  $P_i$  corresponds to the phenotype term set for patient  $i$ , and  $D_i^c$  is the set of correct diseases for patient  $i$ . While  $|D_i^c| = 1$  for most patients in our cohorts, several patients with multiple diseases exist.

## 4 Training SHEPHERD Models

We first describe our approach for training SHEPHERD to perform multi-faceted diagnoses. We provide details about negative sampling strategies, patient-driven sampling, and disease-split training on simulated patient data. We conclude with details regarding hyperparameter tuning and implementation in Pytorch.

### 4.1 Overall Objective Function

We train SHEPHERD in two stages. First, we train the model to learn to capture the relationships between biomedical entities in the rare disease knowledge graph (Section 3.1). Then, we simultaneously train the model to perform patient-centric rare disease tasks and continue predicting knowledge relationships in the KG (Section 3.2-3.4). Concretely, the model is jointly trained to achieve two distinct objectives: (1) to capture the relationships in the underlying knowledge graph and (2) to match a patient’s presenting symptoms with the patient’s causal gene(s), disease(s), or other similar patients. We model these objectives with two separate loss functions, the pretraining link prediction loss,  $L_{LP}$ , and a diagnosis loss,  $L_{DX} \in \{L_G, L_D, L_{PH}\}$ , which aligns patient phenotype terms to genes, diseases, or other patient phenotypes respectively. The overall loss is as follows:

$$L = \lambda L_{DX} + (1 - \lambda) L_{LP} \quad (19)$$

where  $\lambda$  is a hyperparameter controlling the weight of each loss. Whereas during pretraining, we train the model to capture generalizable biomedical knowledge by performing link prediction for all relation types, during fine-tuning, we focus on predicting gene, phenotype, and disease relations, which are most important for rare diseases. Training the model to perform link prediction

enables the model to generalize to phenotypes and genes unseen in the training data.

## 4.2 Negative Sampling

To learn a meaningful representation space, we need negative examples (*i.e.* edges that do not exist in the KG or candidate genes, diseases, or other patients that are not associated with a given patient). The following outlines the negative sampling strategies used for pretraining and each of the three rare disease diagnosis tasks.

**Link prediction.** We construct negative examples of triplets  $(u, r, v^-)$  that do not exist in the KG by perturbing the target *nodes* while preserving the *types* of the source and target nodes and edge relation. For example, given a positive example of a triplet where the node and relation types are *(protein, has phenotype, phenotype)*, a negative example is obtained by shuffling all phenotype *nodes* in the batch, thereby maintaining the node and relation *types* of the positive example.

**Causal gene discovery.** Negative examples are constructed by taking the union of the candidate genes for all patients in a given batch. As noted in Section 2.1 to 2.4, each patient has a list of candidate genes that have been shortlisted as the most probable genes to cause the patient’s symptoms, and identifying the true causal gene(s) among them is especially challenging. We ensure that these “hard” candidate genes are included in the candidate list for each patient during training, as using such “hard” examples tends to improve the efficiency of training [110]. Furthermore, to maximize the number and frequency of candidate genes seen during train time, we up-sample a subset of candidate genes that are under-represented across all patients. Concretely, we count the frequencies of candidate genes in the prior and current batches, select the  $k$  most infrequently seen candidate genes (*i.e.* the  $k$  rarest candidate genes) in training batches, and add them to each patient’s candidate gene list. Note that we only prioritize the “hard” candidate genes for each patient at inference time without any up-sampling.

**Novel disease characterization.** Negative examples include all diseases that do not explain the patient’s symptoms. First, we randomly sample 1,000 diseases from all diseases in the KG to serve as negative examples for each batch. Then, we calculate a patient’s similarity to all disease nodes in the KG at inference time.

**Identifying similar patients.** Negative examples are simply all of the patients in the batch who do



not have the same causal gene as the patient. We construct batches to ensure at least two positive examples (*i.e.*, patients with the same gene) for each patient in the batch. All remaining patients serve as negative examples. At inference time, we calculate a patient's similarity to all patients in the cohort.

### 4.3 Disease-Split Training on Simulated and Publicly Available Patients

We train our model primarily on the simulated patient dataset. Training on simulated data offers several benefits: the simulated cohort is larger and more diverse than any real-world patient dataset, the trained models can be released without the risk of exposing any patient information, and the models can be evaluated on an independent real-world cohort to test how well a model can generalize to patients unseen during training. Further, and most importantly, we achieve generalizability to real-world cohorts by splitting patients into train and validation sets according to disease. Concretely, we split the list of diseases represented by the simulated patient cohort into train and validation. Then, we assign patients to train or validation sets such that patients with the same disease are either entirely in the training or fully in the validation set. As a result, the model is optimized so that its parameters are broadly transferable to patients with different diseases. The resulting train and validation cohorts contain 36,224 and 6,400 patients, respectively.

For the causal gene discovery task, we perform additional training on patients from the MyGene2 and DDD cohorts. These additional cohorts constitute 3.6% of the training data. Unlike the UDN cohort, the MyGene2 and DDD cohorts do not have candidate genes for each patient. Therefore, we construct candidate gene lists by sampling 20 genes that are neighbors of each patient's causal gene or phenotypes in the rare disease knowledge graph.

### 4.4 Additional Training Details

**Node pretraining data split.** Edges in the knowledge graph are randomly split into train (80%), validation (10%), and test sets (10%). Note that the forward and reverse edges of the same pair of nodes are maintained in the same data split to prevent data leakage.

**Patient-driven sampling.** We design a new approach for batch sampling that enables the model to perform patient gene prioritization while maintaining the topology of the KG. We first sample  $m$  patients and add their associated phenotypes and genes to the batch. Then, we add  $n$  nodes randomly sampled from the genes, phenotypes, and disease nodes in the KG. This allows for

inductive generalization by maintaining the topology of nodes not found in the training data.

**Normalization.** To help optimize model performance and convergence, we apply two normalization strategies to SHEPHERD. Specifically, we use LayerNorm [111] immediately after each convolutional layer and BatchNorm [112] following a nonlinear activation layer (here, leaky ReLU).

**Hyperparameter tuning.** We leverage Weights and Biases [113] to select optimal hyperparameters via a random search over the hyperparameter space. We first choose pretraining hyperparameters to optimize the micro F1 score on the pretraining validation set. The pretraining validation set consists of a set of edges that exist in the knowledge graph and a set of edges generated via negative sampling that does not exist (Section 4.2). Hyperparameters were selected via random search from the following values: learning rate  $\in [0.0001, 0.0005, 0.001, 0.005]$ , weight decay  $\in [0, 0.005, 0.0005]$ , dropout  $\in [0.2, 0.3, 0.4, 0.5, 0.6, 0.7, 0.8]$ , and the number of GAT attention heads  $\in [2, 4]$ . We also perform a search over the dimension of the network layers: input size  $\in [2048, 4096]$ , hidden size  $\in [256, 512, 1024]$ , and output size  $\in [64, 128]$ . We then freeze the pretraining hyperparameters and perform a hyperparameter search independently for each rare disease task. We select task-specific hyperparameters to optimize the mean reciprocal rank of the correct genes, diseases, or patients on the disease-split simulated validation set. Importantly, the validation set containing simulated patients is entirely independent of the evaluation dataset, which includes patients from the Undiagnosed Diseases Network. We consider the following hyperparameters: learning rate  $\in [0.00001, 0.00005, 0.0001, 0.0005, 0.001]$ ,  $\lambda \in [0.1, 0.9]$ ,  $\eta \in [0.1, 0.9]$ ,  $k$  most infrequently seen genes  $\in [64, 128, 192]$ , number of transformer layers for the phenotype encoder  $\in [0, 3, 6]$ , number of heads in the transformer layers  $\in [4, 8, 16]$ , contribution of the augmented gene embedding  $\omega \in [0.1, 0.9]$ , number of  $K$  most similar genes to augment the gene embedding  $\in [1, 2, 3, 4, 5]$ , and number of nodes  $n$  to sample per batch  $\in [100, 200, 300, 400]$ . The code for hyperparameter selection and the optimal hyperparameters can be found at <https://github.com/mims-harvard/SHEPHERD>.

**Implementation.** We implement SHEPHERD using Pytorch (Version 1.8.0) [114], Pytorch Lightning (Version 1.4.5) [115], and Pytorch Geometric (Version 1.7.2) [116]. We leverage the Weights and Biases [113] platform for hyperparameter tuning and model training visualization, and we create interactive demos of the model using Gradio [117]. Models are trained on a single NVIDIA Quadro RTX8000 GPU.

## 5 Further Details on Statistical Analysis

We describe the evaluation setup, baseline models, and statistical tests used to evaluate SHEPHERD.

### 5.1 Performance Stratified by Patient and Site Characteristics

We evaluate the trained model on the cohort of real-world UDN patients who have received a molecular diagnosis (Section 2.1). We measure the mean reciprocal rank of all of the patients' causal genes and calculate the percentage of causal genes that appear in the top  $k$  ranked genes for  $k \in \{1, 3, 5\}$  for the EXPERT-CURATED candidate gene lists and  $k \in \{1, 5, 10, 25, 50\}$  for the longer VARIANT-FILTERED candidate gene lists. We analyze the performance across each of the UDN clinical sites, disease categories, and evaluation years. We also assess the correlation between model performance and the number of patient phenotype terms, the distance between the causal gene and phenotype terms in the KG, and the prevalence of the genetic conditions in the population. We leverage the number of ClinVar submissions for the causal gene as a proxy for prevalence.

### 5.2 Comparison to Alternative Approaches

We compare SHEPHERD to several diverse approaches for causal gene discovery. The first category includes network science or machine learning methods that enable us to assess the utility of SHEPHERD's graph neural network approach and the use of simulated patients: (1) mean shortest graph distance, a network-science approach that prioritizes genes according to their average shortest path in the KG to all of a patient's phenotype terms; (2) supervised graph embedding, a logistic regression approach that frames prioritization as a binary prediction task for each candidate gene and represents each patient-gene option as the concatenation of the candidate gene's pretrained node embedding and the patient's averaged phenotype node embeddings; and (3) supervised PCA embedding, a logistic regression approach similar to (2) that, instead of the KG node embeddings, utilizes a PCA-transformed shortest path length matrix from gene nodes to gene, phenotype, and disease nodes.

We also compare SHEPHERD to six phenotype-based methods designed for causal gene discovery. Three are information-theoretic approaches that compare patient phenotype terms to either the phenotype terms associated with each candidate gene (ERIC, which is implemented in XRare [25]) or to the phenotype terms of all the diseases related to a candidate gene (Phrank [16] and PhenIX, which is implemented in Exomiser [24]). In the latter two approaches, each can-

candidate gene is prioritized according to the highest similarity score across all associated diseases. LYRICAL is an approach that uses a likelihood ratio framework to estimate the extent to which patients' phenotypes and genotypes are consistent across all known diseases [21]. CADA is a shallow network embedding-based approach that frames the task as link prediction between phenotype and gene nodes [19]. HiPhive is an approach implemented in Exomiser that leverages ontologies from humans and model organisms to assess phenotypic similarity. When phenotypic data is unavailable for a candidate, HiPhive employs a random walk approach on a protein-protein interaction network to establish connections between the candidate and other genes with similar phenotypes [24]. These baselines constitute a diverse set of methodological approaches for rare disease diagnosis. LIRICAL, XRare, and Exomiser are the strongest performing approaches in a prior comparison of gene prioritization tools [118], and Exomiser is currently in use at multiple UDN sites [47]. Finally, we compare to a non-guided baseline, Random, which represents performance without prioritizing candidate genes.

When possible, we leverage publicly available code and our KG to implement each causal gene discovery benchmark to elucidate whether performance differences were due to the algorithmic approach rather than a different or more up-to-date underlying knowledge base. In instances where we are unable to leverage our KG (*i.e.*, for LIRICAL, HiPhive, and PhenIX), we leverage input data that includes only the gene-phenotype-disease associations that were present at the time when our rare disease KG was constructed to enable a fairer comparison. We use code from <https://bitbucket.org/bejerano/phrank> and <https://github.com/Chengyao-Peng/CADA> to run Phrank and CADA, respectively, using our rare disease KG. We run Exomiser v13.0.1 (released Nov 23, 2021) using their time-stamped input data from <https://github.com/exomiser/Exomiser/tree/13.0.1>. We run Exomiser with two different phenotype similarity options, PhenIX and HiPhive, and we leverage the GENE\_PHENO\_SCORE for prioritization. We re-implement the ERIC phenotype similarity score used in XRare; direct gene-phenotype edges and indirect gene-disease-phenotype paths from our KG are used to construct the phenotype terms associated with each candidate gene. We run LIRICAL with the “orphanet” data flag using code from <https://github.com/TheJacksonLaboratory/LIRICAL> by supplying both a VCF file and positive and negative (*i.e.*, that the patient did not exhibit) phenotype terms. Notably, all baselines except for LIRICAL leverage Exomiser to generate the VARIANT-FILTERED candidate genes for each patient before phenotype-based prioritization. In contrast, LIRICAL performs its variant-based filtering using the provided VCF files.

We also compare SHEPHERD to approaches that can be used to identify similar patients.

The information theoretic approach Phrank can be leveraged to calculate the semantic similarity between two sets of patient phenotype terms based on the information content of their shared phenotype ancestors in the Human Phenotype Ontology [16]. SET BASED calculates distance between two sets of phenotype terms  $P_i$  and  $P_j$  using Jaccard distance, defined as  $J = 1 - \frac{|P_i \cap P_j|}{|P_i \cup P_j|}$ .

We further compare SHEPHERD to a network-based phenotype search approach for novel disease characterization. For each patient phenotype, we identify its associated diseases based on our KG (*i.e.*, direct disease neighbors of each phenotype node) and retrieve the disease category of the diseases. The percent similarity of the patient's disease presentation to each disease category is computed as the percentage of the associated diseases in that category. These similarities become the KG-derived interpretable name for the patient's novel disease presentation.

### 5.3 Assessing Statistical Significance

We perform a one-sided Wilcoxon signed-rank test to assess whether there is a significant difference in causal gene performance between SHEPHERD and baseline methods. After confirming that the data is not normally distributed, we evaluate whether there is a statistically significant difference in SHEPHERD's performance across sites, evaluation years, and primary presenting symptoms using a Kruskal-Wallis H-test. In the knowledge graph, we calculate the Spearman correlation coefficient to measure the correlation between causal gene rank and the distance between a patient's phenotype terms and causal gene. To assess whether patients cluster by disease category, we perform K-means clustering with  $k$  set to the number of disease categories, and we evaluate the clusters according to an adjusted mutual information score from `scikit-learn`, which is designed to consider clusters of different sizes. We assess the significance of the resulting clustering via a permutation test with 100 random permutations of the true cluster labels. We perform a Mann-Whitney test to measure the difference in distances in embedding space for patients with the same versus different disease categories. Finally, we perform the two-sample Kolmogorov-Smirnov test to assess whether the distribution of embedding distances for patients with the same disease is identical to that for patients with different diseases.

### 5.4 Visualization of Learned Embeddings

We visualize embeddings learned via SHEPHERD in a Uniform Manifold Approximation and Projection (UMAP) plot [119]. We use the `umap-learn` Python package [120] and perform a grid search over the `n_neighbors`, `min_dist`, and `spread` UMAP parameters. We select param-

ters that maintain global structure in the main panel of Figure 5a and Figure 6a.

## 5.5 Visualization of Patient Neighborhoods in the Knowledge Graph

To visualize the local neighborhood of patients' disease, phenotype, and gene nodes (Figure 4), we calculate the shortest paths between patient-relevant nodes and extract all nodes in those shortest paths. We visualize the resulting patient neighborhoods using Gephi 0.9.4 [121]. We apply Fruchterman Reingold, Noverlap, and Label Adjust layouts and manual adjustment to organize the nodes so they do not overlap.



## References

1. Rehm, H. L. Time to make rare disease diagnosis accessible to all. *Nature Medicine* **28**, 241–242 (2022).
2. Haendel, M. *et al.* How many rare diseases are there? *Nature Reviews Drug Discovery* (2020).
3. Nguengang Wakap, S. *et al.* Estimating cumulative point prevalence of rare diseases: analysis of the Orphanet database. *European Journal of Human Genetics* (2020).
4. Whicher, D., Philbin, S. & Aronson, N. An overview of the impact of rare disease characteristics on research methodology. *Orphanet Journal of Rare Diseases* (2018).
5. Gahl, W. A. *et al.* The NIH Undiagnosed Diseases Program: Insights into Rare Diseases. *Genetics in Medicine* (2012).
6. Chong, J. X. *et al.* The Genetic Basis of Mendelian Phenotypes: Discoveries, Challenges, and Opportunities. *American Journal of Human Genetics* (2015).
7. Steinhaus, R. *et al.* MutationTaster2021. *Nucleic Acids Research* **49**, W446 (2021). Publisher: Oxford University Press.
8. Rentzsch, P., Witten, D., Cooper, G. M., Shendure, J. & Kircher, M. CADD: predicting the deleteriousness of variants throughout the human genome. *Nucleic Acids Research* **47**, D886–D894 (2019).
9. Jagadeesh, K. A. *et al.* M-CAP eliminates a majority of variants of uncertain significance in clinical exomes at high sensitivity. *Nature Genetics* **48**, 1581–1586 (2016). Number: 12 Publisher: Nature Publishing Group.
10. Gurovich, Y. *et al.* Identifying facial phenotypes of genetic disorders using deep learning. *Nature Medicine* **25**, 60–64 (2019). Number: 1 Publisher: Nature Publishing Group.
11. Hsieh, T.-C. *et al.* GestaltMatcher facilitates rare disease matching using facial phenotype descriptors. *Nature Genetics* **54**, 349–357 (2022). Number: 3 Publisher: Nature Publishing Group.
12. Hsieh, T.-C. *et al.* PEDIA: prioritization of exome data by image analysis. *Genetics in Medicine* **21**, 2807–2814 (2019). Number: 12 Publisher: Nature Publishing Group.
13. Duong, D. *et al.* Neural Networks for Classification and Image Generation of Aging in Genetic Syndromes. *Frontiers in Genetics* **13**, 864092 (2022).
14. Hong, D. *et al.* Genetic syndromes screening by facial recognition technology: VGG-16 screening model construction and evaluation. *Orphanet Journal of Rare Diseases* **16**, 344 (2021).
15. Shukla, P., Gupta, T., Saini, A., Singh, P. & Balasubramanian, R. A Deep Learning Framework for Recognizing Developmental Disorders. In *2017 IEEE Winter Conference on Applications of Computer Vision (WACV)*, 705–714 (2017).
16. Jagadeesh, K. A. *et al.* Phrank measures phenotype sets similarity to greatly improve Mendelian diagnostic disease prioritization. *Genetics in Medicine* (2019).

17. Yang, H., Robinson, P. N. & Wang, K. Phenolyzer: phenotype-based prioritization of candidate genes for human diseases. *Nature Methods* **12**, 841–843 (2015). Number: 9 Publisher: Nature Publishing Group.
18. Köhler, S. *et al.* Clinical Diagnostics in Human Genetics with Semantic Similarity Searches in Ontologies. *American Journal of Human Genetics* **85**, 457–464 (2009).
19. Peng, C. *et al.* CADA: phenotype-driven gene prioritization based on a case-enriched knowledge graph. *NAR Genomics and Bioinformatics* (2021).
20. Rao, A. *et al.* Phenotype-driven gene prioritization for rare diseases using graph convolution on heterogeneous networks. *BMC Medical Genomics* **11**, 57 (2018).
21. Robinson, P. N. *et al.* Interpretable Clinical Genomics with a Likelihood Ratio Paradigm. *American Journal of Human Genetics* **107**, 403–417 (2020).
22. Javed, A., Agrawal, S. & Ng, P. C. Phen-Gen: combining phenotype and genotype to analyze rare disorders. *Nature Methods* **11**, 935–937 (2014). Number: 9 Publisher: Nature Publishing Group.
23. Mao, D. *et al.* AI-MARRVEL — A Knowledge-Driven AI System for Diagnosing Mendelian Disorders. *NEJM AI* **1**, AIoa2300009 (2024). Publisher: Massachusetts Medical Society.
24. Smedley, D. *et al.* Next-generation diagnostics and disease-gene discovery with the exomiser. *Nature Protocols* (2015).
25. Li, Q., Zhao, K., Bustamante, C. D., Ma, X. & Wong, W. H. Xrare: a machine learning method jointly modeling phenotypes and genetic evidence for rare disease diagnosis. *Genetics in Medicine* **21**, 2126–2134 (2019). Number: 9 Publisher: Nature Publishing Group.
26. Birgmeier, J. *et al.* AMELIE speeds Mendelian diagnosis by matching patient phenotype and genotype to primary literature. *Science Translational Medicine* **12**, eaau9113 (2020).
27. Yoo, B., Birgmeier, J., Bernstein, J. A. & Bejerano, G. InpherNet accelerates monogenic disease diagnosis using patients' candidate genes' neighbors. *Genetics in Medicine* **23**, 1984–1992 (2021). Number: 10 Publisher: Nature Publishing Group.
28. Anderson, D., Baynam, G., Blackwell, J. M. & Lassmann, T. Personalised analytics for rare disease diagnostics. *Nature Communications* **10**, 5274 (2019). Number: 1 Publisher: Nature Publishing Group.
29. Splinter, K. *et al.* Effect of genetic diagnosis on patients with previously undiagnosed disease. *New England Journal of Medicine* (2018).
30. The 100,000 Genomes Project Pilot Investigators *et al.* 100,000 Genomes Pilot on Rare-Disease Diagnosis in Health Care — Preliminary Report. *New England Journal of Medicine* **385**, 1868–1880 (2021).
31. Topol, E. J. High-performance medicine: the convergence of human and artificial intelligence. *Nature Medicine* (2019).
32. Yu, K.-H., Beam, A. L. & Kohane, I. S. Artificial intelligence in healthcare. *Nature Biomedical Engineering* (2018).
33. Liu, Y. *et al.* A deep learning system for differential diagnosis of skin diseases. *Nature Medicine* (2020).

34. Saldanha, O. L. *et al.* Swarm learning for decentralized artificial intelligence in cancer histopathology. *Nature Medicine* (2022).
35. Bulten, W. *et al.* Artificial intelligence for diagnosis and Gleason grading of prostate cancer: the PANDA challenge. *Nature Medicine* (2022).
36. Ribeiro, A. H. *et al.* Automatic diagnosis of the 12-lead ECG using a deep neural network. *Nature Communications* (2020).
37. Tang, A. S. *et al.* Deep phenotyping of Alzheimer's disease leveraging electronic medical records identifies sex-specific clinical associations. *Nature Communications* (2022).
38. Qiu, S. *et al.* Multimodal deep learning for Alzheimer's disease dementia assessment. *Nature Communications* (2022).
39. Tschandl, P. *et al.* Human–computer collaboration for skin cancer recognition. *Nature Medicine* (2020).
40. De Fauw, J. *et al.* Clinically applicable deep learning for diagnosis and referral in retinal disease. *Nature Medicine* (2018).
41. Gulshan, V. *et al.* Development and Validation of a Deep Learning Algorithm for Detection of Diabetic Retinopathy in Retinal Fundus Photographs. *JAMA* (2016).
42. Esteva, A. *et al.* Dermatologist-level classification of skin cancer with deep neural networks. *Nature* (2017).
43. Liang, H. *et al.* Evaluation and accurate diagnoses of pediatric diseases using artificial intelligence. *Nature Medicine* (2019).
44. Boudellioua, I., Kulmanov, M., Schofield, P. N., Gkoutos, G. V. & Hoehndorf, R. DeepPVP: phenotype-based prioritization of causative variants using deep learning. *BMC Bioinformatics* **20**, 65 (2019).
45. Alsentzer, E., Finlayson, S. G., Li, M. M., Kobren, S. N. & Kohane, I. S. Simulation of undiagnosed patients with novel genetic conditions. *medRxiv* (2022).
46. Ramoni, R. B. *et al.* The Undiagnosed Diseases Network: Accelerating Discovery about Health and Disease. *The American Journal of Human Genetics* (2017).
47. Kobren, S. N. *et al.* Commonalities across computational workflows for uncovering explanatory variants in undiagnosed cases. *Genetics in Medicine* **23**, 1075–1085 (2021). Publisher: Nature Publishing Group.
48. Zemojtel, T. *et al.* Effective diagnosis of genetic disease by computational phenotype analysis of the disease-associated genome. *Science Translational Medicine* (2014).
49. Chen, R. J., Lu, M. Y., Chen, T. Y., Williamson, D. F. K. & Mahmood, F. Synthetic data in machine learning for medicine and healthcare. *Nature Biomedical Engineering* (2021).
50. Genomics, U. o. W. C. f. M. MyGene2.
51. Firth, H. V., Wright, C. F. & DDD Study. The Deciphering Developmental Disorders (DDD) study. *Developmental Medicine and Child Neurology* **53**, 702–703 (2011).

52. Wicks, P. *et al.* Sharing health data for better outcomes on patientslikeme. *Journal of Medical Internet research* (2010).
53. Gerarduzzi, C. *et al.* Silencing SMOC2 ameliorates kidney fibrosis by inhibiting fibroblast to myofibroblast transformation. *JCI Insight* (2017).
54. Morkmued, S. *et al.* Deficiency of the SMOC2 matricellular protein impairs bone healing and produces age-dependent bone loss. *Scientific Reports* (2020).
55. Romio, L. *et al.* *OFD1*, the Gene Mutated in Oral-Facial-Digital Syndrome Type 1, Is Expressed in the Metanephros and in Human Embryonic Renal Mesenchymal Cells. *Journal of the American Society of Nephrology* (2003).
56. Saal, S. *et al.* Renal insufficiency, a frequent complication with age in oral-facial-digital syndrome type I. *Clinical Genetics* (2010).
57. Ganapathi, M. *et al.* A homozygous splice variant in *atp5po*, disrupts mitochondrial complex v function and causes leigh syndrome in two unrelated families. *Journal of Inherited Metabolic Disease* (2022).
58. Chen, H., Morris, M. A., Rossier, C., Blouin, J.-L. & Antonarakis, S. E. Cloning of the cDNA for the human atp synthase *oscp* subunit (*atp50*) by exon trapping and mapping to chromosome 21q22.1-q22.2. *Genomics* (1995).
59. Aggeler, R. *et al.* A functionally active human *f1f0* atpase can be purified by immunocapture from heart tissue and fibroblast cell lines: subunit structure and activity studies. *Journal of Biological Chemistry* (2002).
60. Brautigam, C. A., Wynn, R. M., Chuang, J. L. & Chuang, D. T. Subunit and catalytic component stoichiometries of an in vitro reconstituted human pyruvate dehydrogenase complex. *Journal of Biological Chemistry* (2009).
61. Jiang, Y. *et al.* Component co-expression and purification of recombinant human pyruvate dehydrogenase complex from baculovirus infected sf9 cells. *Protein Expression and Purification* (2014).
62. Glasgow, R. I. *et al.* Novel *gfm2* variants associated with early-onset neurological presentations of mitochondrial disease and impaired expression of oxphos subunits. *Neurogenetics* (2017).
63. Warde-Farley, D. *et al.* The genemania prediction server: biological network integration for gene prioritization and predicting gene function. *Nucleic Acids Research* (2010).
64. Franz, M. *et al.* Genemania update 2018. *Nucleic Acids Research* (2018).
65. Ispolatov, I., Yuryev, A., Mazo, I. & Maslov, S. Binding properties and evolution of homodimers in protein-protein interaction networks. *Nucleic Acids Research* **33**, 3629–3635 (2005).
66. Keskin, O., Tuncbag, N. & Gursoy, A. Predicting protein-protein interactions from the molecular to the proteome level. *Chemical Reviews* **116**, 4884–4909 (2016).
67. Zitnik, M., Sosič, R., Feldman, M. W. & Leskovec, J. Evolution of resilience in protein interactomes across the tree of life. *Proceedings of the National Academy of Sciences* **116**, 4426–4433 (2019).

68. Westermarck, J., Ivaska, J. & Corthals, G. L. Identification of protein interactions involved in cellular signaling. *Molecular & Cellular Proteomics* (2013).
69. Luck, K. *et al.* A reference map of the human binary protein interactome. *Nature* (2020).
70. Tyler, A. L., Asselbergs, F. W., Williams, S. M. & Moore, J. H. Shadows of complexity: what biological networks reveal about epistasis and pleiotropy. *BioEssays* (2009).
71. Hu, J. X., Thomas, C. E. & Brunak, S. Network biology concepts in complex disease comorbidities. *Nature Reviews Genetics* (2016).
72. Ried, J. S. *et al.* PSEA: Phenotype Set Enrichment Analysis—A New Method for Analysis of Multiple Phenotypes. *Genetic Epidemiology* (2012).
73. Li, J., Cairns, B. J., Li, J. & Zhu, T. Generating Synthetic Mixed-type Longitudinal Electronic Health Records for Artificial Intelligent Applications (2021).
74. Mahmood, F. *et al.* Deep Adversarial Training for Multi-Organ Nuclei Segmentation in Histopathology Images. *IEEE Transactions on Medical Imaging* (2020).
75. Waheed, A. *et al.* CovidGAN: Data Augmentation Using Auxiliary Classifier GAN for Improved Covid-19 Detection. *IEEE Access* (2020).
76. Jaipuria, N. *et al.* Deflating Dataset Bias Using Synthetic Data Augmentation. In *CVPR* (2020).
77. Frid-Adar, M., Klang, E., Amitai, M., Goldberger, J. & Greenspan, H. Synthetic data augmentation using GAN for improved liver lesion classification. In *ISBI* (2018).
78. Oprisanu, B., Ganev, G. & De Cristofaro, E. On Utility and Privacy in Synthetic Genomic Data. *arXiv:2102.03314* (2022).
79. Wang, Z., Myles, P. & Tucker, A. Generating and evaluating cross-sectional synthetic electronic healthcare data: Preserving data utility and patient privacy. *Computational Intelligence* (2021).
80. Wang, J. *et al.* MARRVEL: Integration of Human and Model Organism Genetic Resources to Facilitate Functional Annotation of the Human Genome. *The American Journal of Human Genetics* (2017).
81. Chandak, P., Huang, K. & Zitnik, M. Building a knowledge graph to enable precision medicine. *Scientific Data* **10**, 67 (2023).
82. Marwaha, S., Knowles, J. W. & Ashley, E. A. A guide for the diagnosis of rare and undiagnosed disease: beyond the exome. *Genome Medicine* (2022).
83. Consortium, G. O. The gene ontology resource: 20 years and still going strong. *Nucleic Acids Research* (2019).
84. Jassal, B. *et al.* The reactome pathway knowledgebase. *Nucleic Acids Research* (2020).
85. Piñero, J. *et al.* The disgenet knowledge platform for disease genomics: 2019 update. *Nucleic Acids Research* (2020).
86. Maglott, D., Ostell, J., Pruitt, K. D. & Tatusova, T. Entrez gene: gene-centered information at ncbi. *Nucleic Acids Research* (2005).



87. Köhler, S. *et al.* Expansion of the human phenotype ontology (hpo) knowledge base and resources. *Nucleic Acids Research* (2019).
88. Vasilevsky, N. *et al.* Mondo disease ontology: harmonizing disease concepts across the world. In *CEUR-WS* (2020).
89. Pavan, S. *et al.* Clinical practice guidelines for rare diseases: the orphanet database. *PloS One* (2017).
90. Asikainen, A., Iñiguez, G., Ureña-Carrión, J., Kaski, K. & Kivelä, M. Cumulative effects of triadic closure and homophily in social networks. *Science Advances* (2020).
91. Kovács, I. A. *et al.* Network-based prediction of protein interactions. *Nature Communications* (2019).
92. Aken, B. L. *et al.* The ensembl gene annotation system. *Database* (2016).
93. Menche, J. *et al.* Uncovering disease-disease relationships through the incomplete interactome. *Science* (2015).
94. Oughtred, R. *et al.* The biogrid database: A comprehensive biomedical resource of curated protein, genetic, and chemical interactions. *Protein Science* (2021).
95. Szklarczyk, D. *et al.* The string database in 2021: customizable protein–protein networks, and functional characterization of user-uploaded gene/measurement sets. *Nucleic Acids Research* (2021).
96. Gahl, W. A., Wise, A. L. & Ashley, E. A. The undiagnosed diseases network of the national institutes of health: a national extension. *JAMA* (2015).
97. Girdea, M. *et al.* Phenotips: Patient phenotyping software for clinical and research use. *Human Mutation* (2013).
98. Richards, S. *et al.* Standards and Guidelines for the Interpretation of Sequence Variants: A Joint Consensus Recommendation of the American College of Medical Genetics and Genomics and the Association for Molecular Pathology. *Genetics in Medicine* (2015).
99. UDN Manual of Operations (2022).
100. Robinson, P. N. *et al.* Improved exome prioritization of disease genes through cross-species phenotype comparison. *Genome Research* (2014).
101. Hamosh, A. *et al.* Online Mendelian Inheritance in Man (OMIM), a knowledgebase of human genes and genetic disorders. *Nucleic Acids Research* (2002).
102. Philippakis, A. A. *et al.* The Matchmaker Exchange: A Platform for Rare Disease Gene Discovery. *Human Mutation* (2015).
103. Brody, S., Alon, U. & Yahav, E. How attentive are graph attention networks? (2021).
104. Yang, B., Yih, W.-t., He, X., Gao, J. & Deng, L. Embedding Entities and Relations for Learning and Inference in Knowledge Bases. *arXiv:1412.6575* (2015).
105. Glorot, X. & Bengio, Y. Understanding the difficulty of training deep feedforward neural networks. In *AISTATS* (2010).

106. Huang, K. *et al.* Zero-shot prediction of therapeutic use with geometric deep learning and clinician centered design. *medRxiv* (2023).
107. Zolotareva, O. & Kleine, M. A survey of gene prioritization tools for mendelian and complex human diseases. *Journal of Integrative Bioinformatics* (2019).
108. Wang, X., Han, X., Huang, W., Dong, D. & Scott, M. R. Multi-similarity loss with general pair weighting for deep metric learning. In *CVPR* (2019).
109. Goldberger, J., Hinton, G. E., Roweis, S. & Salakhutdinov, R. R. Neighbourhood Components Analysis. In *NeurIPS* (2004).
110. Zhao, Z.-Q., Zheng, P., Xu, S.-t. & Wu, X. Object detection with deep learning: A review. *IEEE Transactions on Neural Networks and Learning Systems* (2019).
111. Ba, J. L., Kiros, J. R. & Hinton, G. E. Layer normalization. *arXiv:1607.06450* (2016).
112. Ioffe, S. & Szegedy, C. Batch normalization: Accelerating deep network training by reducing internal covariate shift. In *ICML* (2015).
113. Biewald, L. Experiment tracking with weights and biases (2020).
114. Paszke, A. *et al.* Pytorch: An imperative style, high-performance deep learning library. In *NeurIPS* (2019).
115. Falcon, W. & The PyTorch Lightning team. PyTorch Lightning (2019).
116. Fey, M. & Lenssen, J. E. Fast graph representation learning with PyTorch Geometric. In *ICLR Workshop on Representation Learning on Graphs and Manifolds* (2019).
117. Abid, A. *et al.* Gradio: Hassle-free sharing and testing of ml models in the wild. *arXiv:1906.02569* (2019).
118. Tosco-Herrera, E. *et al.* Evaluation of a whole-exome sequencing pipeline and benchmarking of causal germline variant prioritizers. *Human Mutation* **43**, 2010–2020 (2022).
119. McInnes, L., Healy, J. & Melville, J. UMAP: Uniform Manifold Approximation and Projection for Dimension Reduction (2020).
120. McInnes, L. Outlier detection using UMAP — umap 0.5 documentation (2018).
121. Bastian, M., Heymann, S. & Jacomy, M. Gephi: an open source software for exploring and manipulating networks. In *Proceedings of the international AAAI conference on web and social media*, vol. 3, 361–362 (2009).
